# Supplementary material
Source: publisher figshare collection journal article supplement (https://acs.figshare.com/ndownloader/files/28289092)
Supplement: Supplementary file 1 [file 28289092]

**Supporting Information for**

**Transport of anions across dialytic membrane induced by  
complexation towards dendritic receptors**

Petra Cuřínová,<sup>a,c</sup> Maximilian Winkler,<sup>a</sup> Alena Krupková,<sup>a,c</sup> Ivana Císařová,<sup>d</sup> Jan Budka,<sup>b</sup> Chang Nga Wun,<sup>b</sup> Vratislav Blechta,<sup>a</sup> Marek Malý,<sup>c</sup> Lucie Červenková Šťastná,<sup>a,c</sup> Jan Sýkora,<sup>\*,a</sup> and Tomáš Strašák<sup>\*,a,c</sup>

<sup>a</sup> *Institute of Chemical Process Fundamentals of CAS v.v.i., Rozvojová 135, 16502 Prague 6, Czech Republic.*

<sup>b</sup> *Department of Organic Chemistry, University of Chemistry and Technology Prague, Technická 5, 16628 Prague 6, Czech Republic.*

<sup>c</sup> *Faculty of Science, J. E. Purkyně University, České mládeže 8, 40096 Ústí nad Labem, Czech Republic.*

<sup>d</sup> *Department of Inorganic Chemistry, Faculty of Sciences, Charles University, Hlavova 2030, 12800 Prague 2, Czech Republic.*

**A list of contents:**

|                                                       |     |
|-------------------------------------------------------|-----|
| Spectral characterization of compounds .....          | S2  |
| NMR titration data .....                              | S13 |
| Detailed description of preliminary experiments ..... | S23 |
| Details for the final dialytic experiment .....       | S24 |
| Computer Modelling .....                              | S25 |

## Spectral characterization of compounds

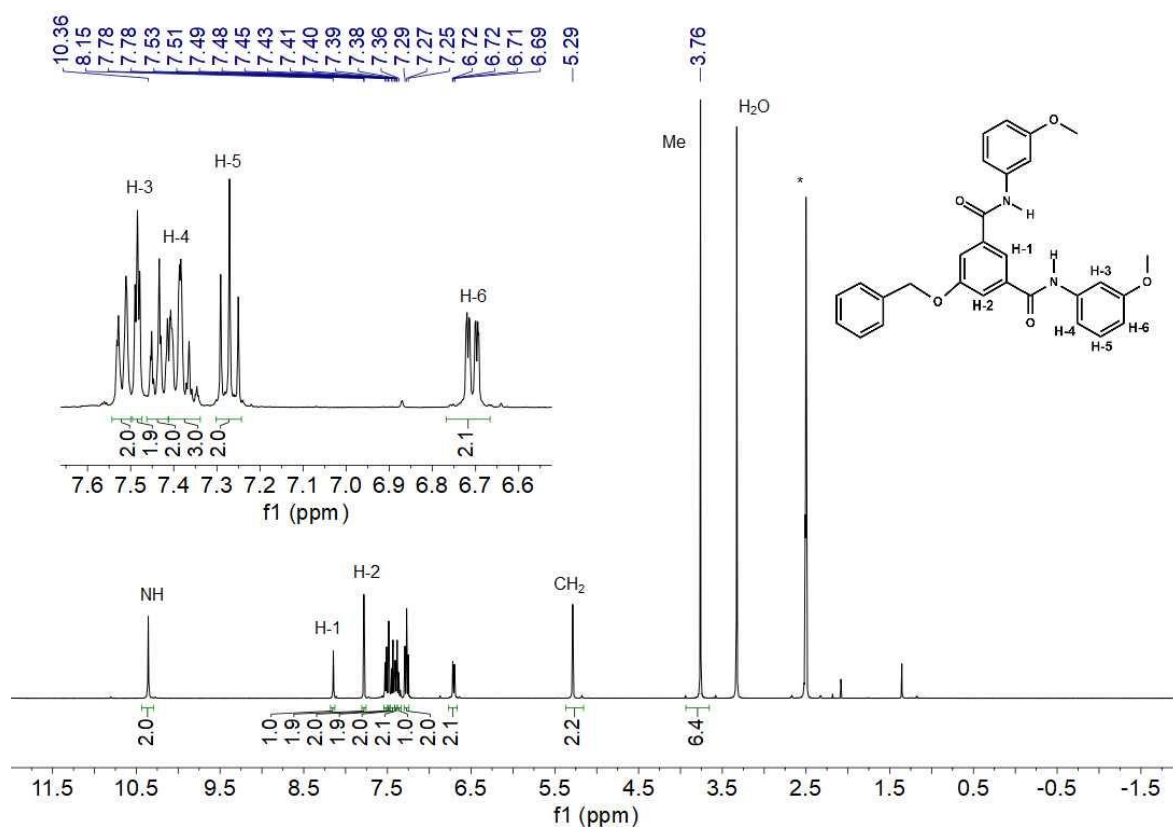

**Figure S1.** Receptor **M1** <sup>1</sup>H NMR (400 MHz), DMSO-*d*<sub>6</sub>.

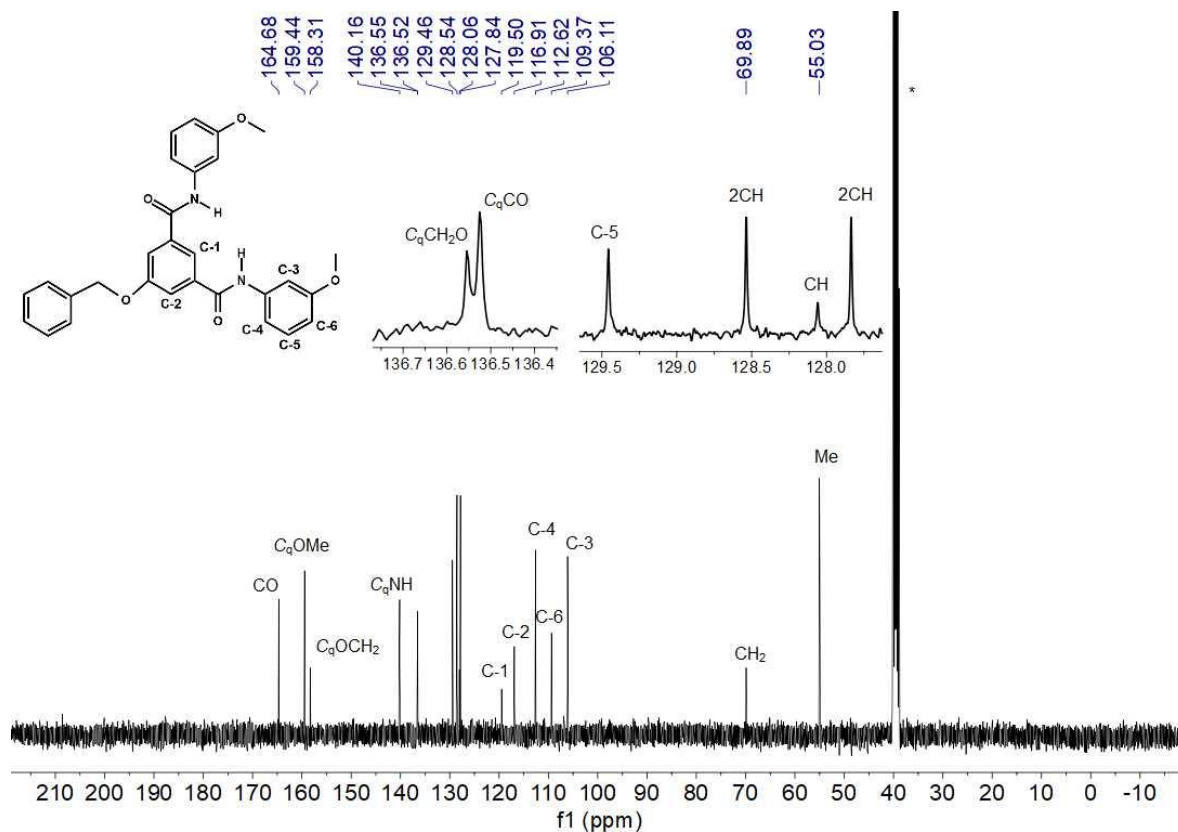

**Figure S2.** Receptor **M1** <sup>13</sup>C NMR (101 MHz), DMSO-*d*<sub>6</sub>.

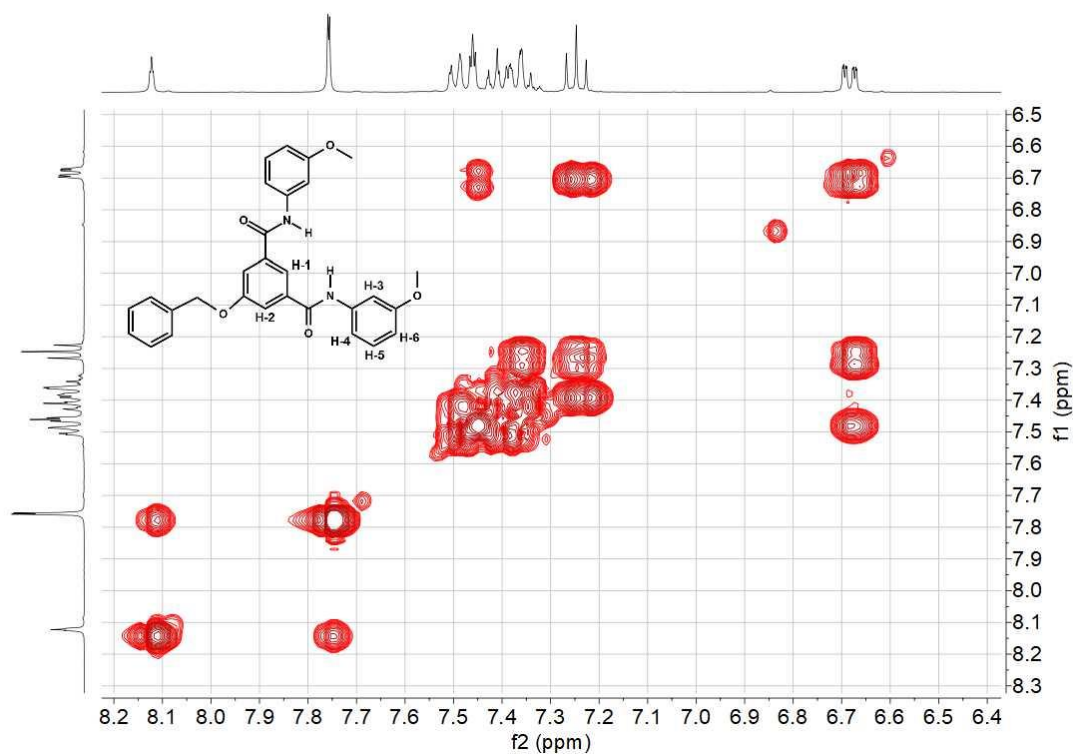

**Figure S3.** Receptor **M1**  $^1\text{H}$ - $^1\text{H}$  COSY (400 MHz),  $\text{DMSO}-d_6$ .

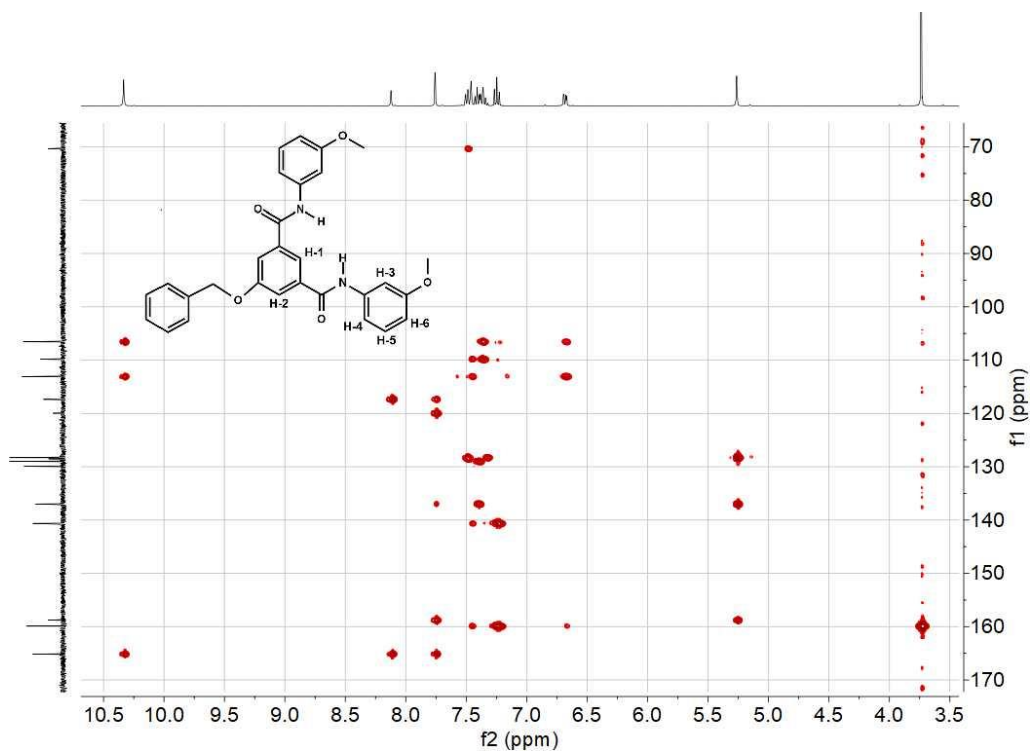

**Figure S4.** Receptor **M1**  $^1\text{H}$ - $^{13}\text{C}$  HMBC (400, 101 MHz),  $\text{DMSO}-d_6$ .

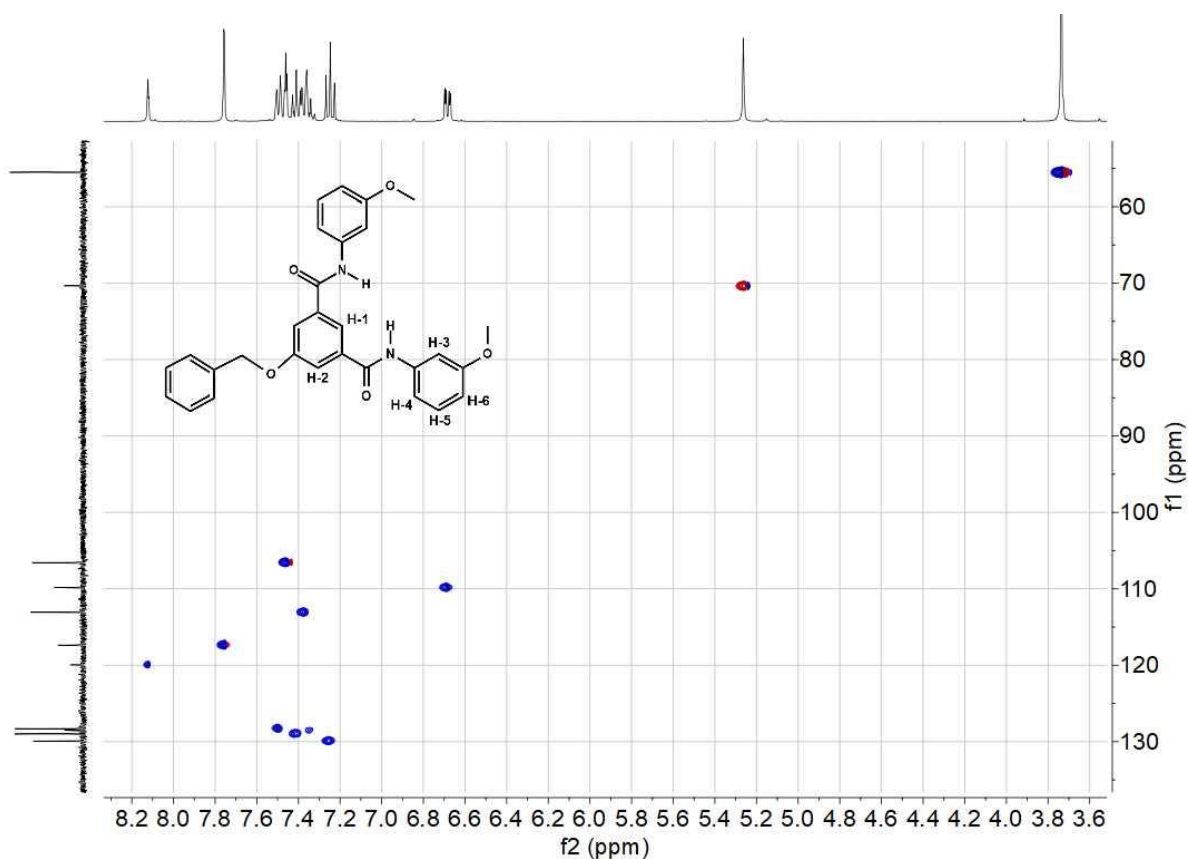

**Figure S5.** Receptor **M1**  $^1\text{H}$ - $^{13}\text{C}$  HSQC (400, 101 MHz),  $\text{DMSO-}d_6$ .

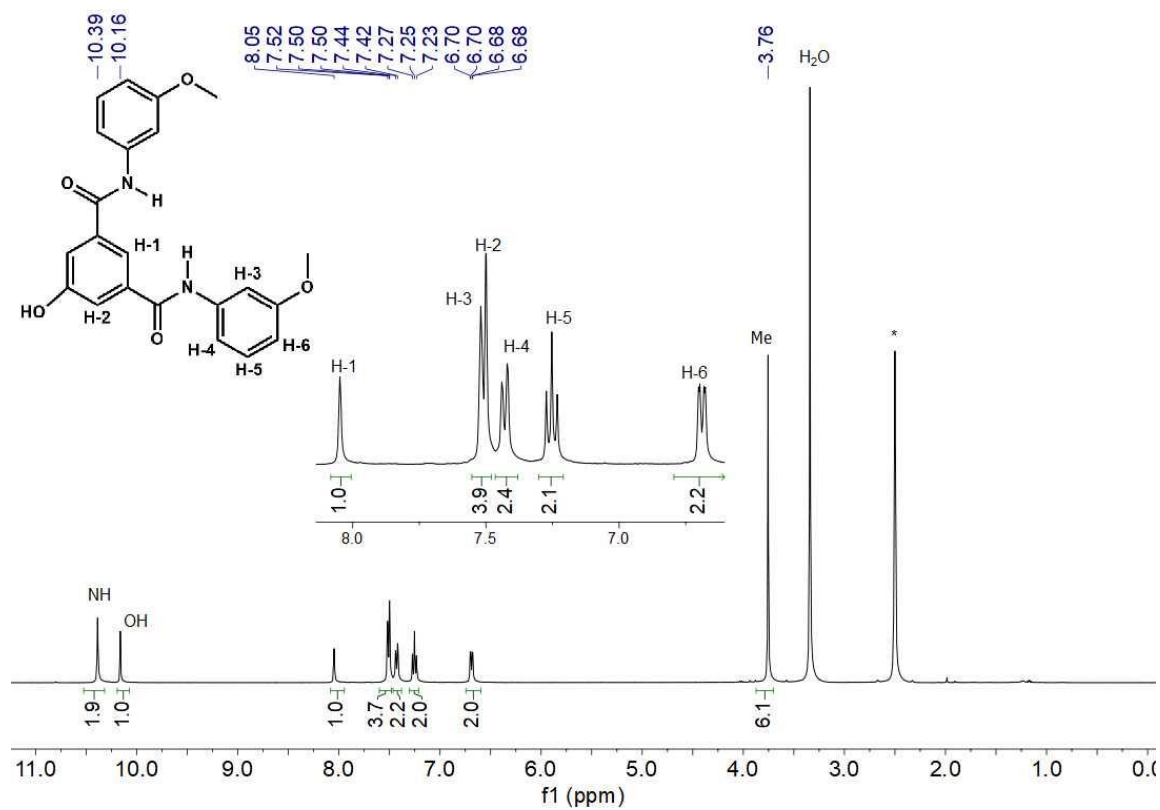

**Figure S6.** 5-Hydroxy-*N,N'*-bis(3-methoxyphenyl)isophthalamide,  $^1\text{H}$  NMR (400 MHz),  $\text{DMSO-}d_6$ .

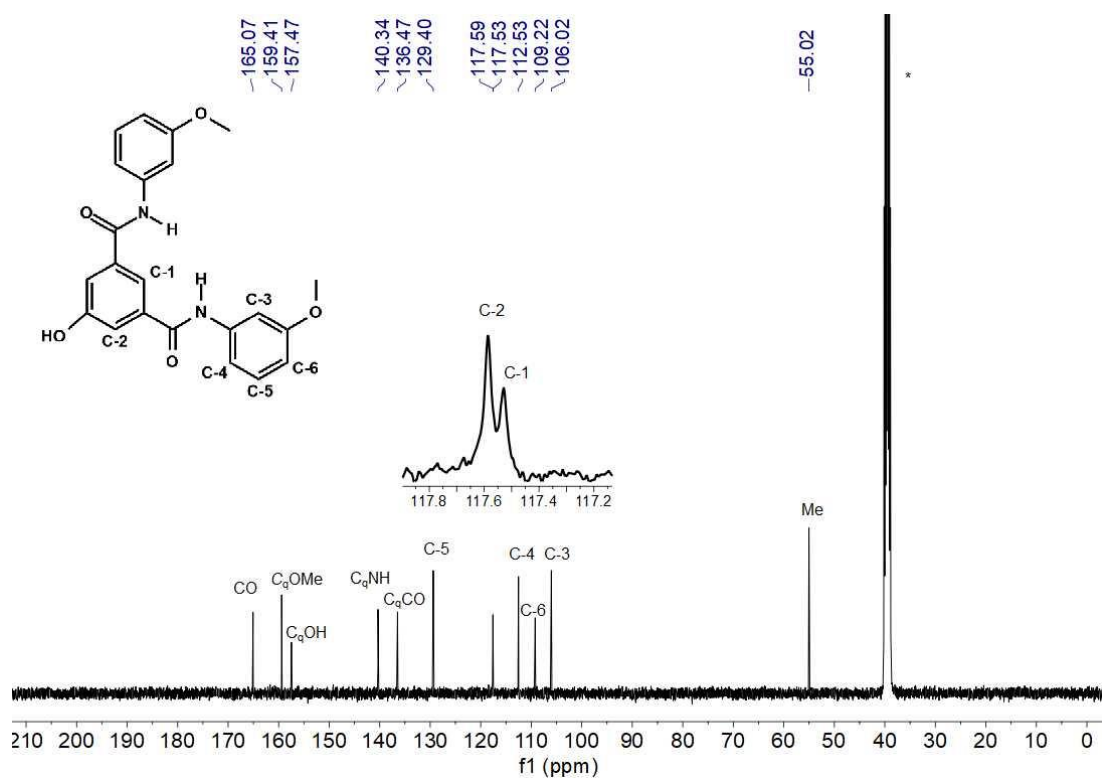

**Figure S7.** 5-Hydroxy-*N,N'*-bis(3-methoxyphenyl)isophthalamide,  $^{13}\text{C}$  NMR (101 MHz), DMSO- $d_6$ .

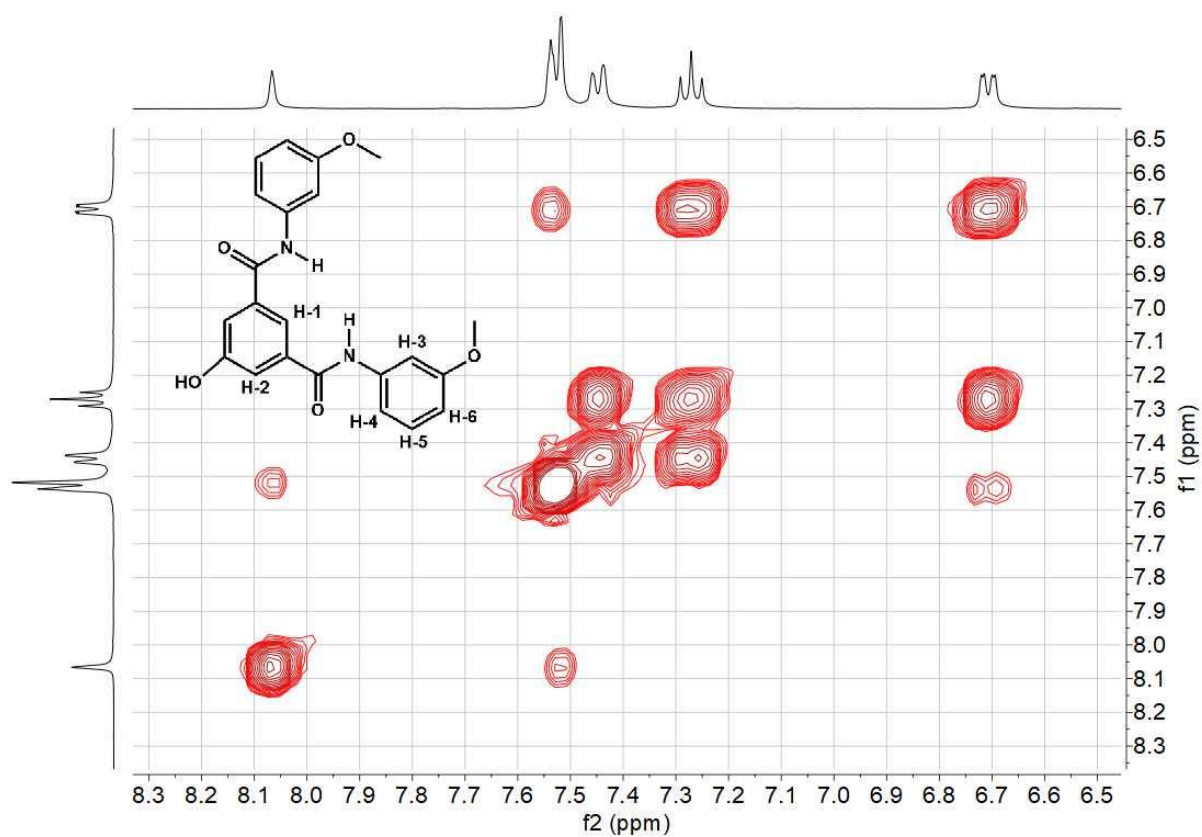

**Figure S8.** 5-Hydroxy-*N,N'*-bis(3-methoxyphenyl)isophthalamide,  $^1\text{H}$ - $^1\text{H}$  COSY (400 MHz), DMSO- $d_6$

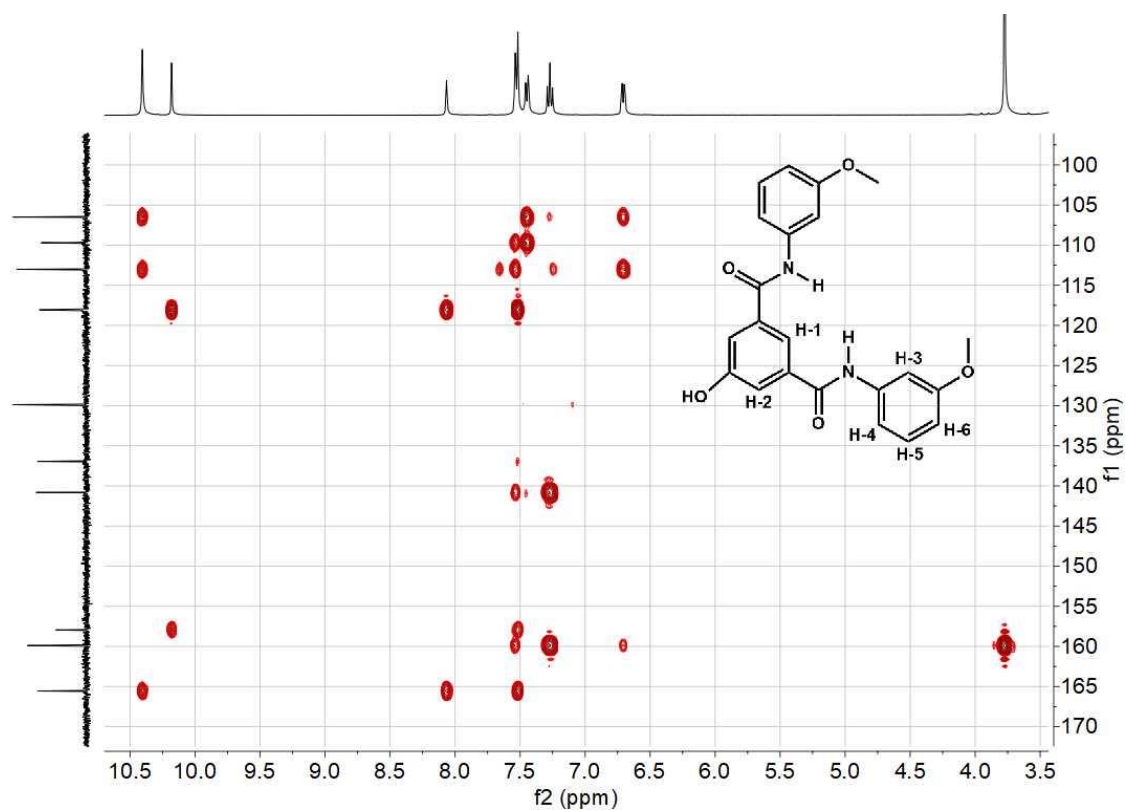

**Figure S9.** 5-Hydroxy-*N,N'*-bis(3-methoxyphenyl)isophthalamide,  $^1\text{H}$ - $^{13}\text{C}$  HMBC (400, 101 MHz),  $\text{DMSO}-d_6$ .

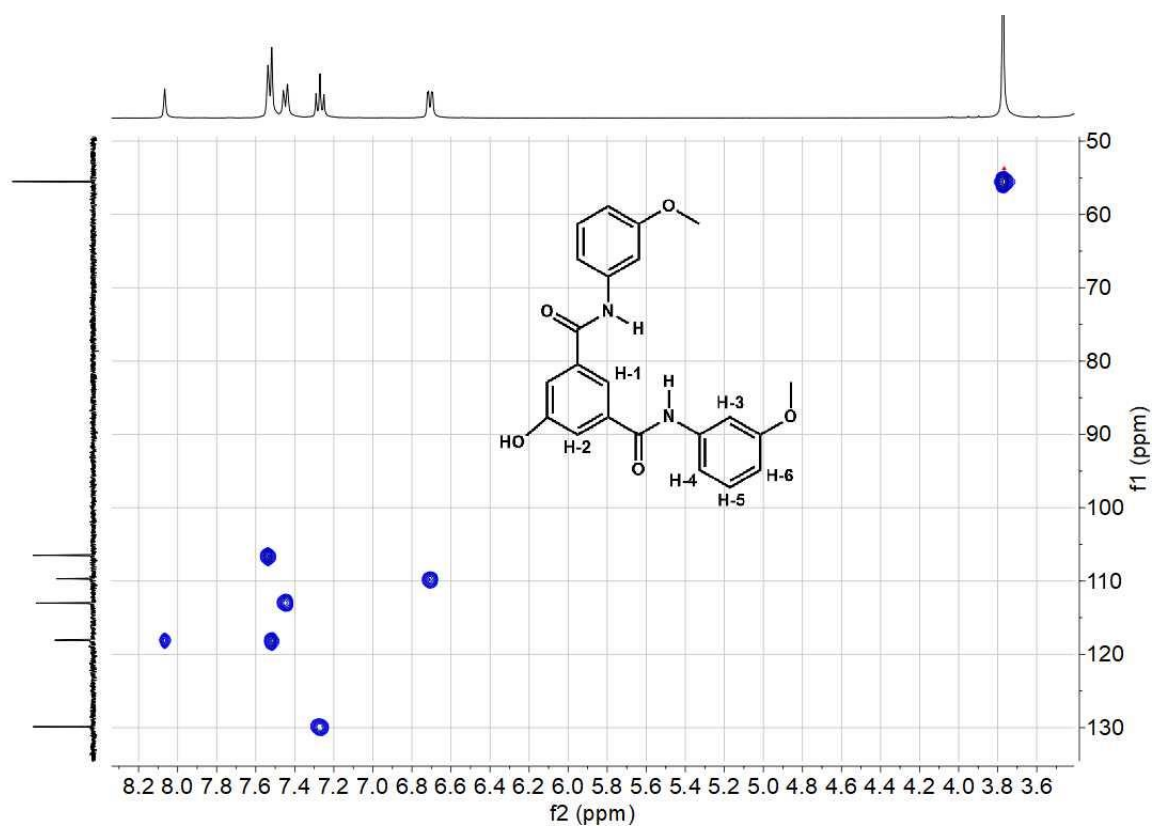

**Figure S10.** 5-Hydroxy-*N,N'*-bis(3-methoxyphenyl)isophthalamide,  $^1\text{H}$ - $^{13}\text{C}$  HSQC (400, 101 MHz),  $\text{DMSO}-d_6$ .

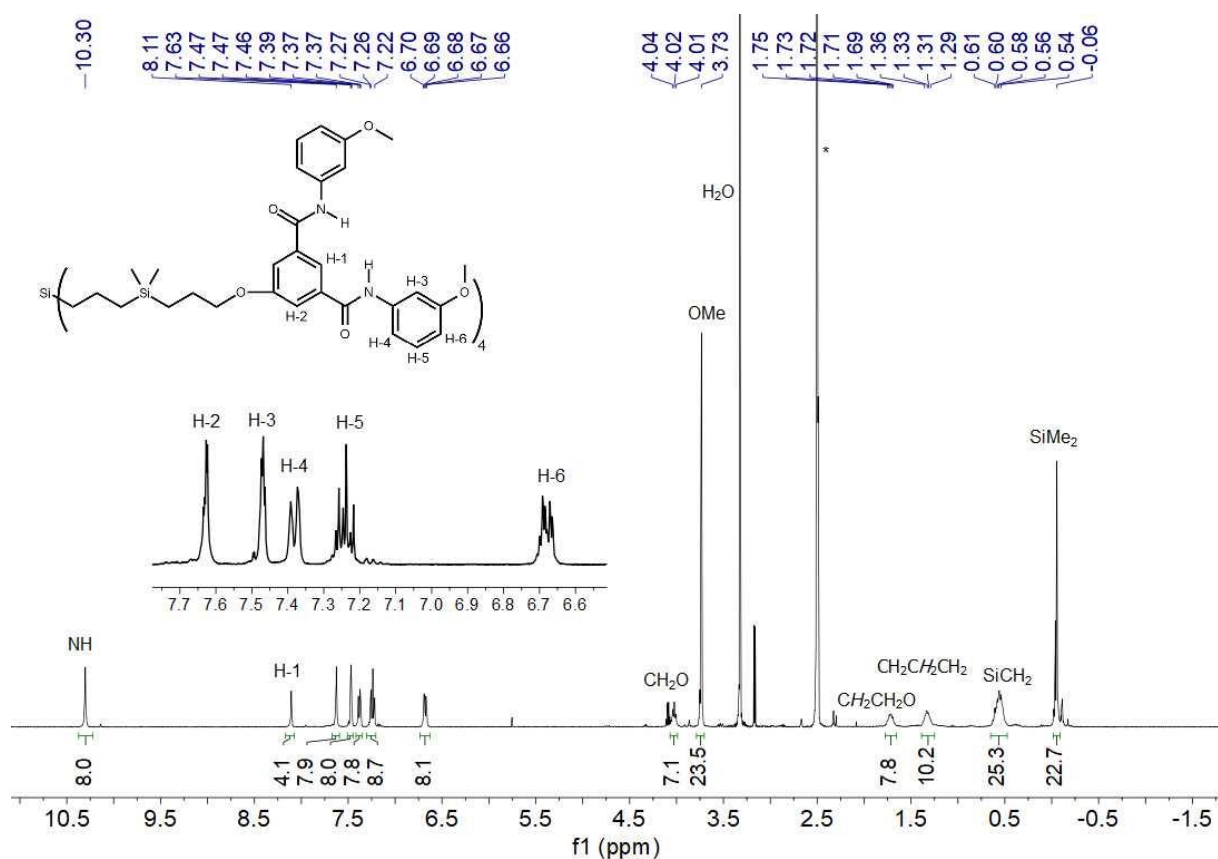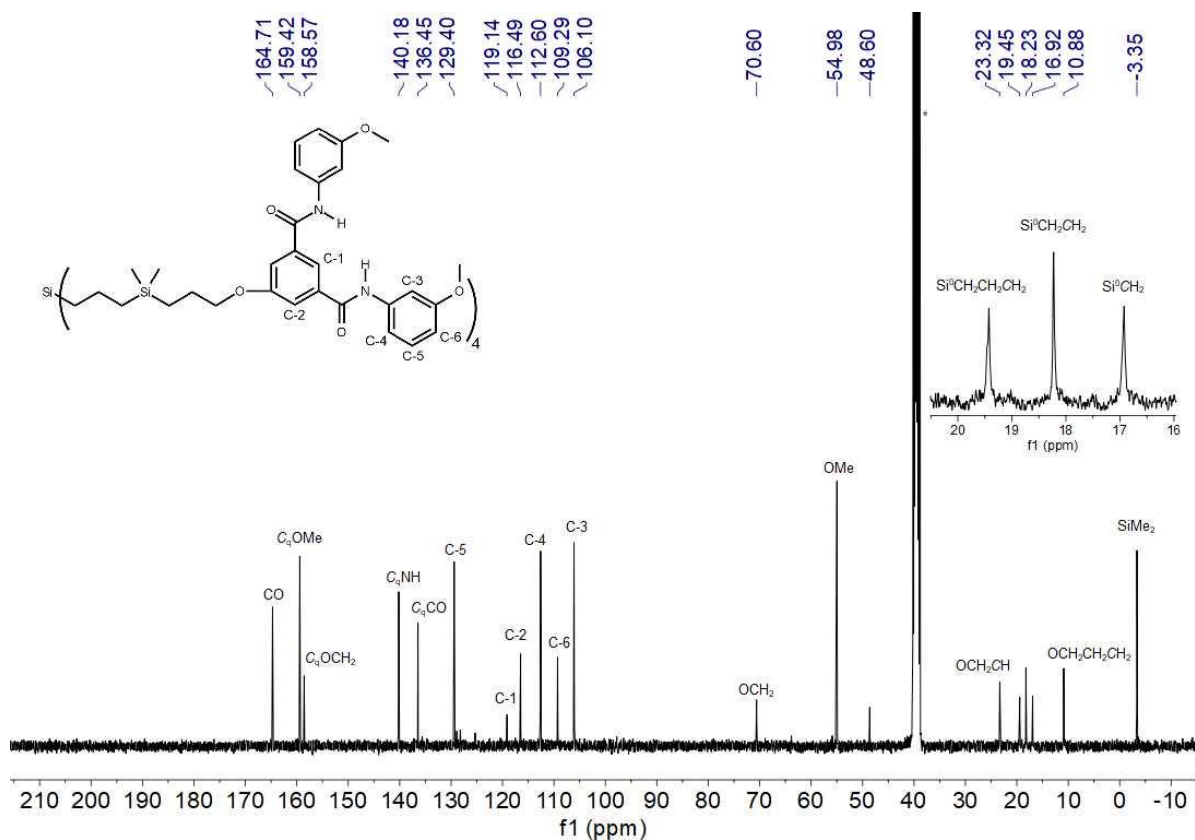

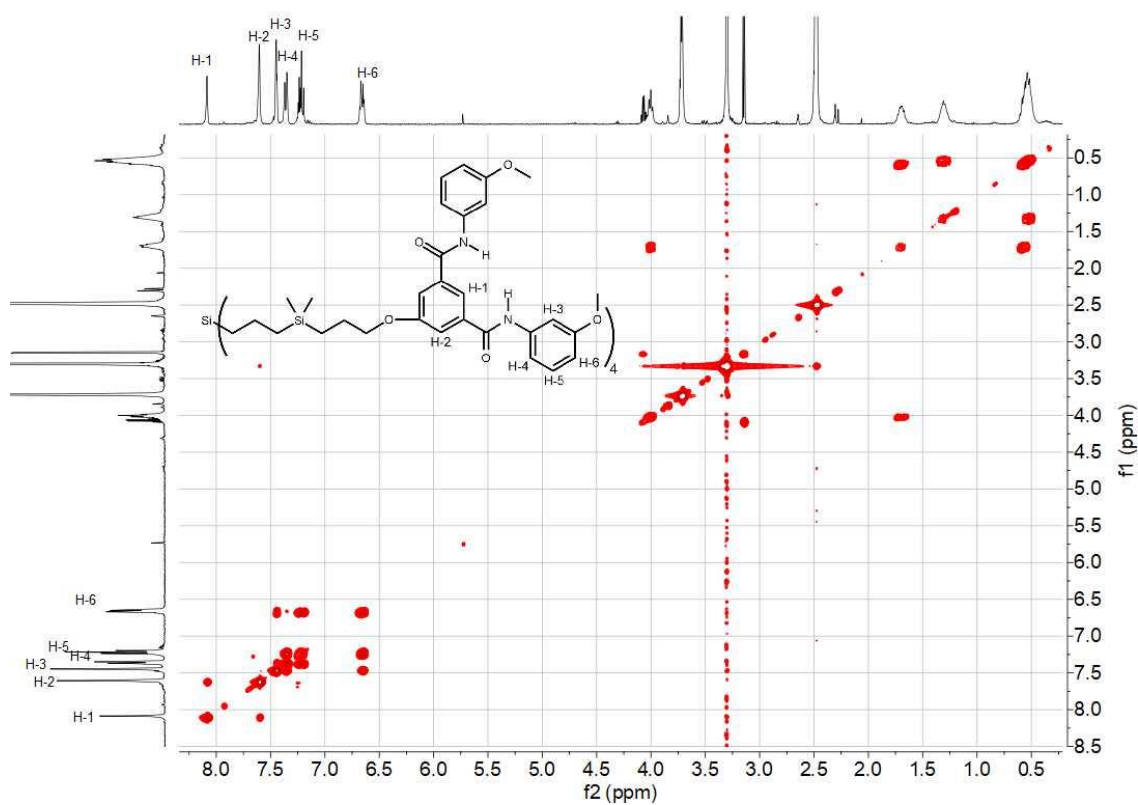

**Figure S13.** Receptor **Dm1**  $^1\text{H}$ - $^1\text{H}$  COSY (400 MHz),  $\text{DMSO}-d_6$ .

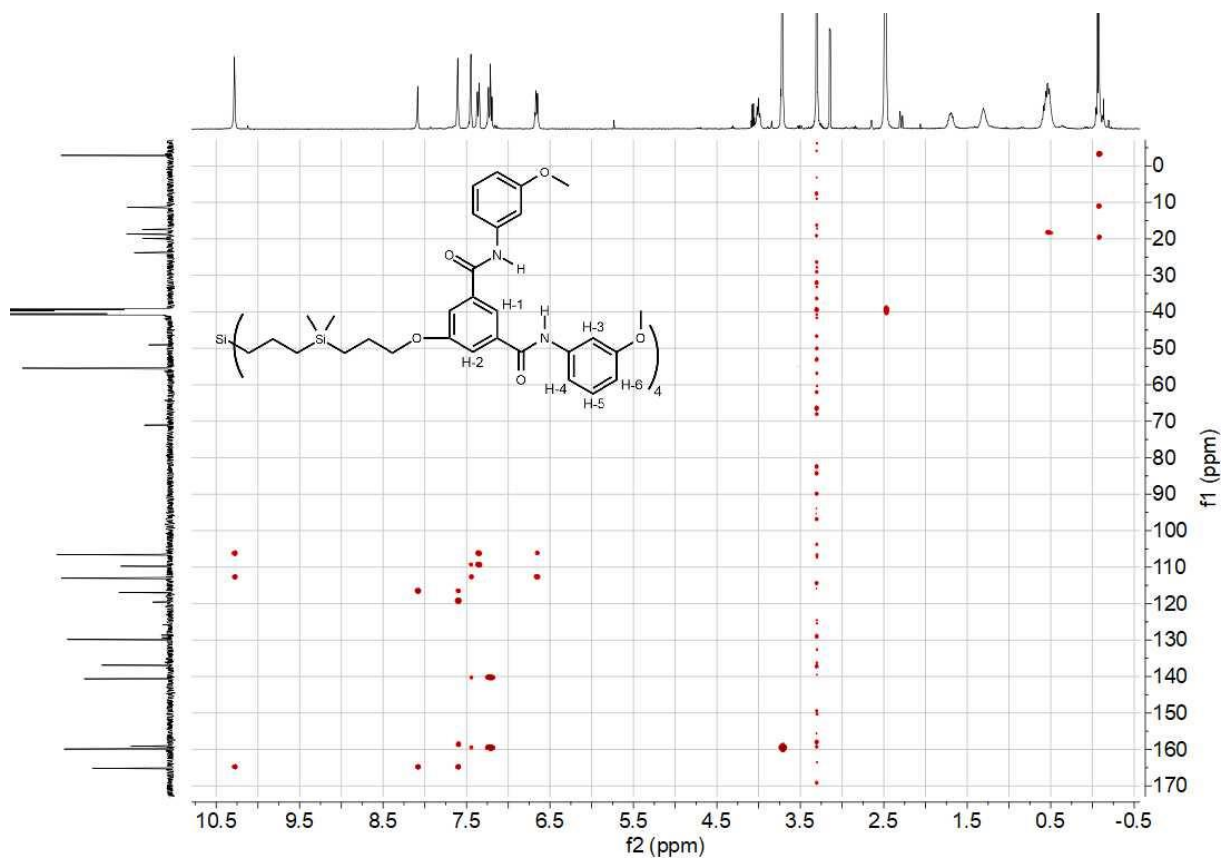

**Figure S14.** Receptor **Dm1**  $^1\text{H}$ - $^{13}\text{C}$  HMBC (400, 101 MHz),  $\text{DMSO}-d_6$ .

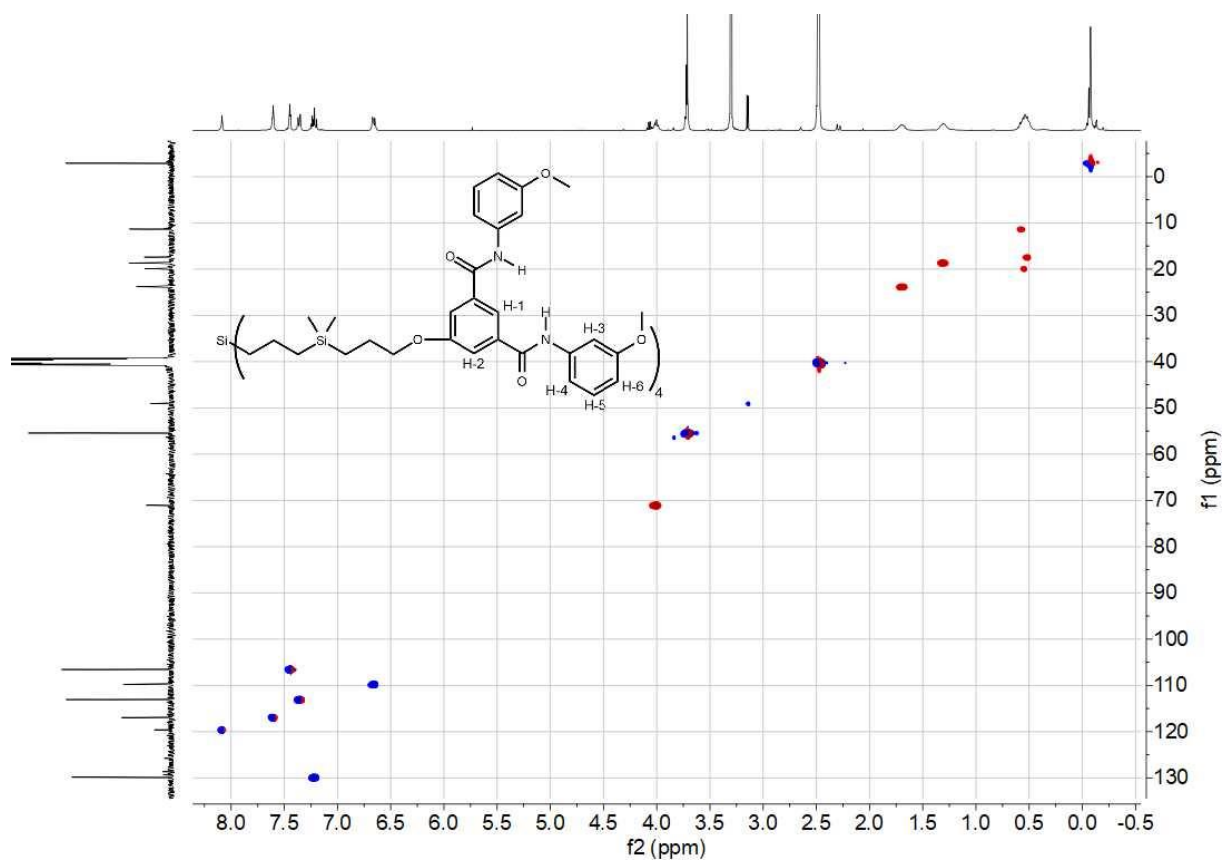

**Figure S15.** Receptor **Dm1**  $^1\text{H}$ - $^{13}\text{C}$  HSQC (400, 101 MHz),  $\text{DMSO-}d_6$ .

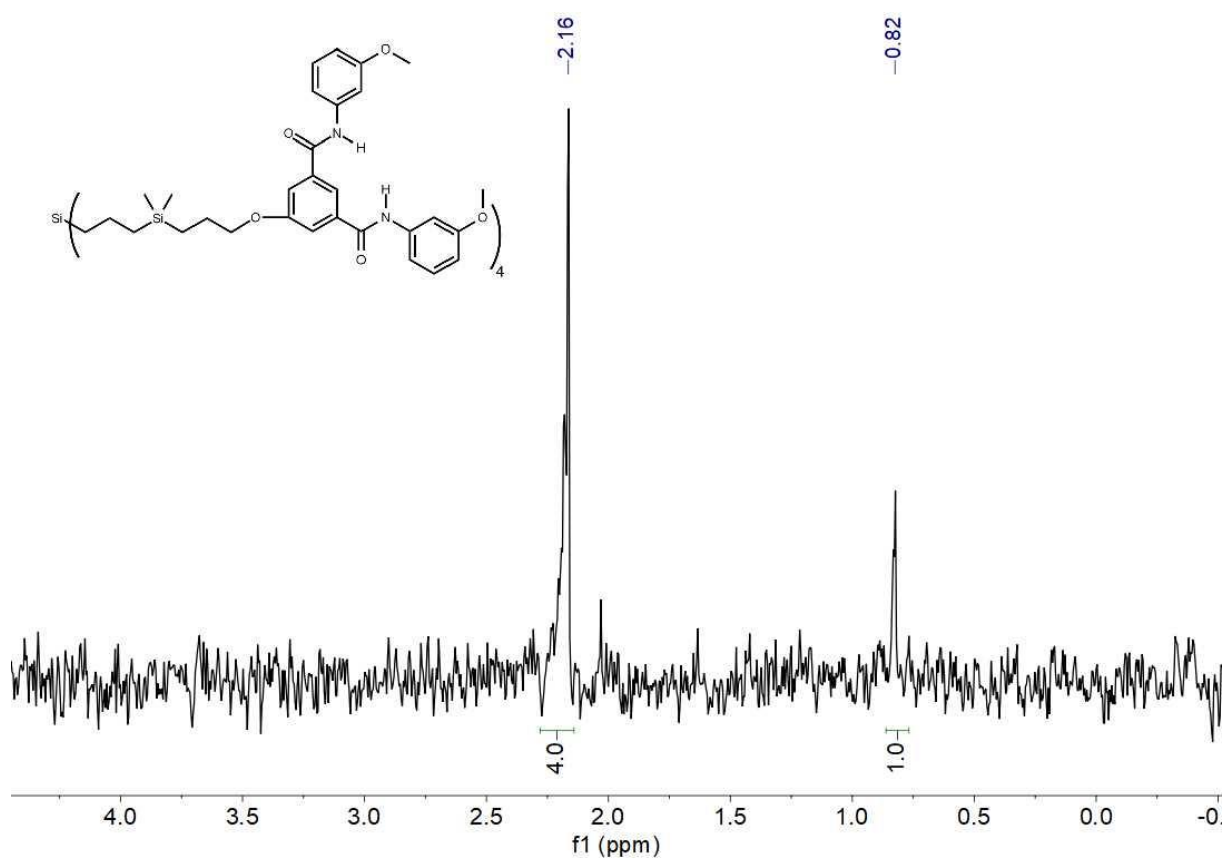

**Figure S16.** Receptor **Dm1**  $^{29}\text{Si}$  NMR (80 MHz),  $\text{DMSO-}d_6$ .

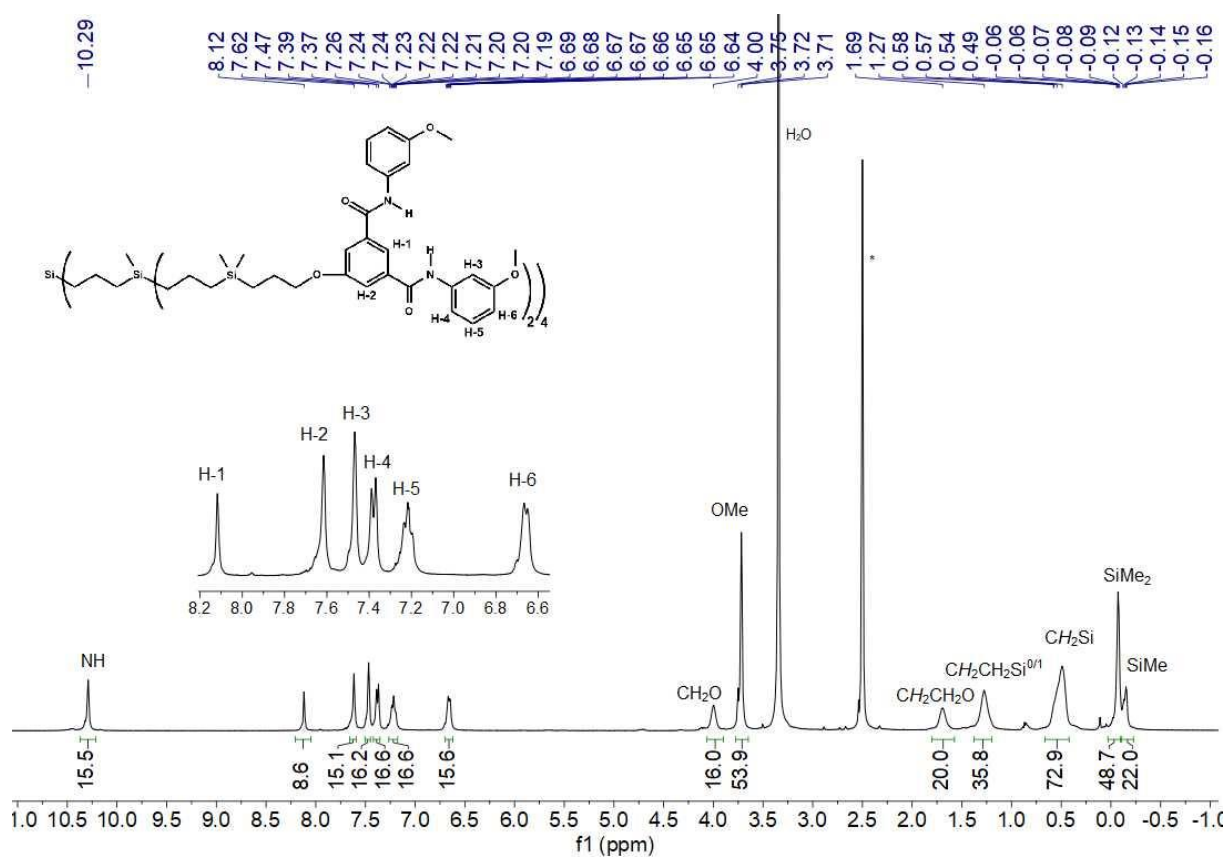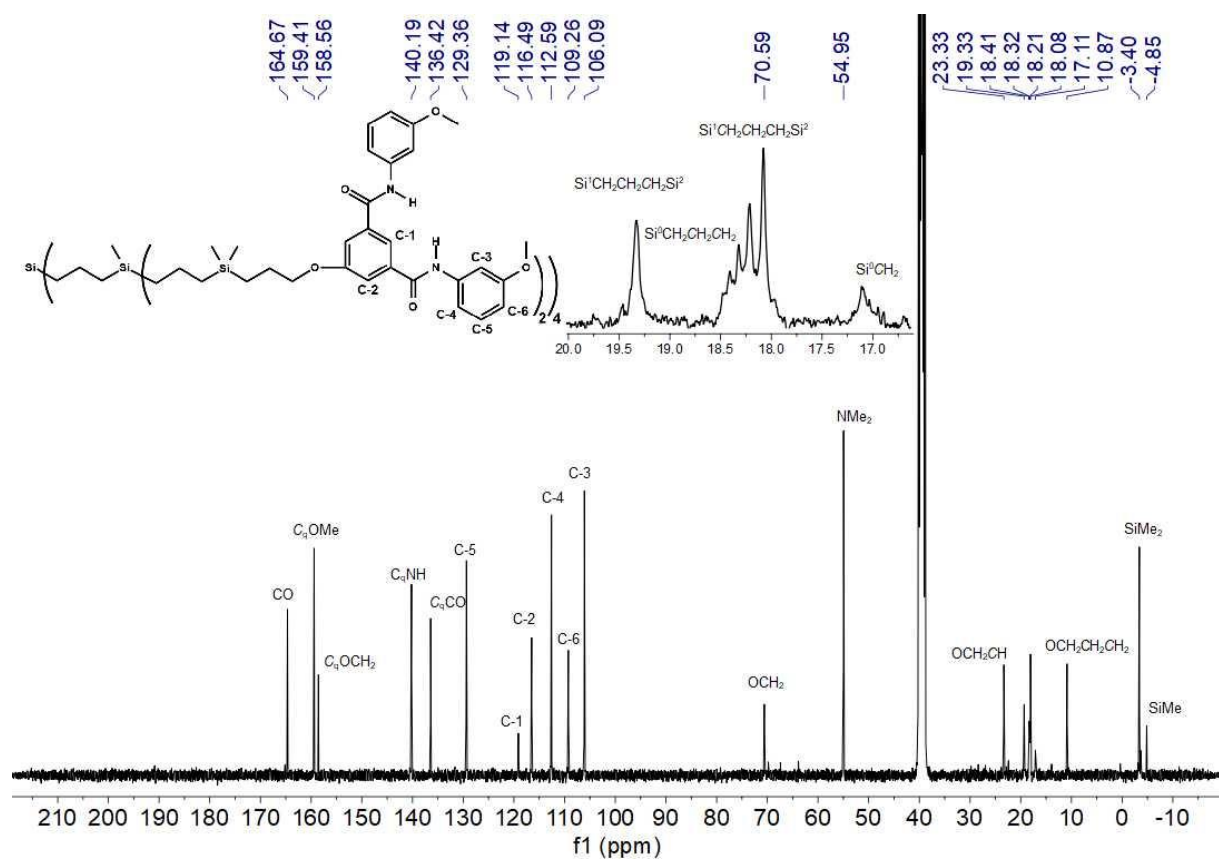

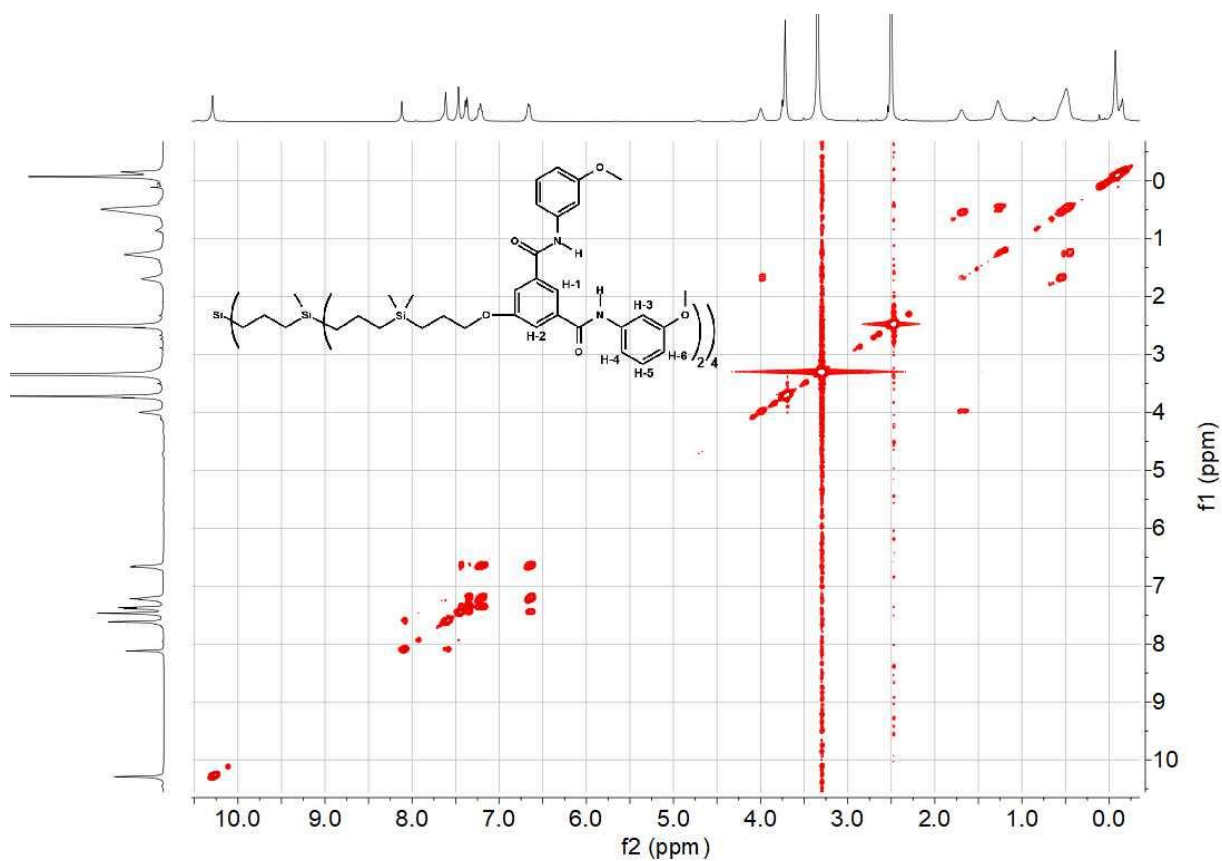

**Figure S19.** Receptor **Dm2**  $^1\text{H}$ - $^1\text{H}$  COSY (400 MHz),  $\text{DMSO-}d_6$ .

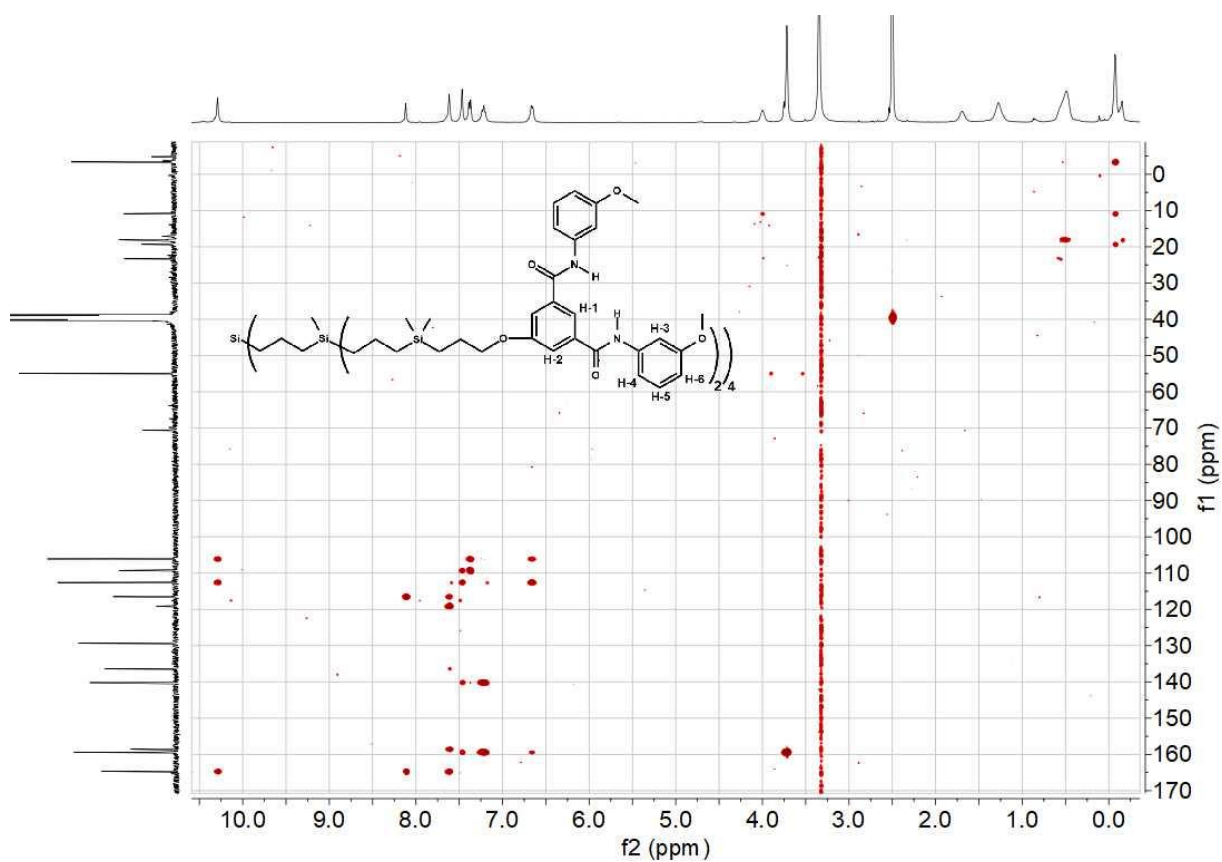

**Figure S20.** Receptor **Dm2**  $^1\text{H}$ - $^{13}\text{C}$  HMBC (400, 101 MHz),  $\text{DMSO-}d_6$ .

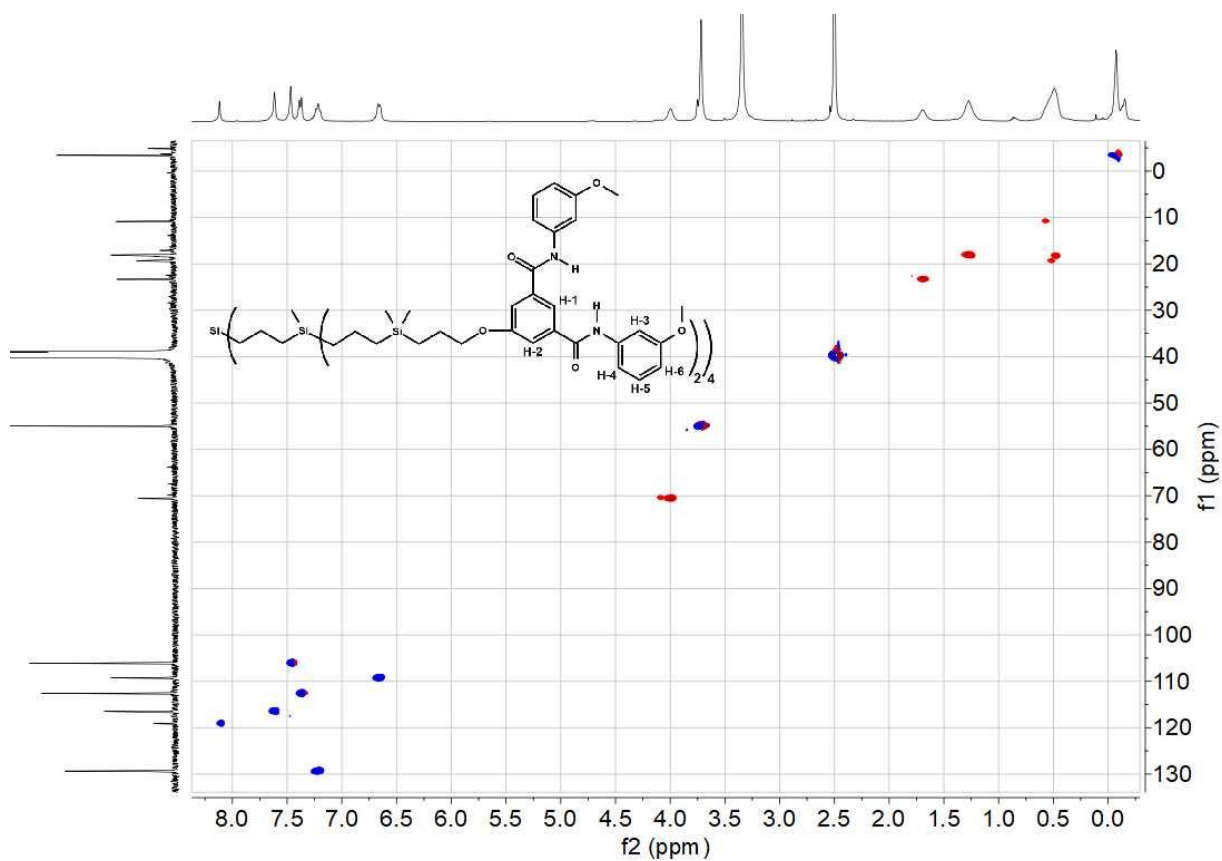

**Figure S21.** Receptor **Dm2**  $^1\text{H}$ - $^{13}\text{C}$  HSQC (400, 101 MHz),  $\text{DMSO-}d_6$ .

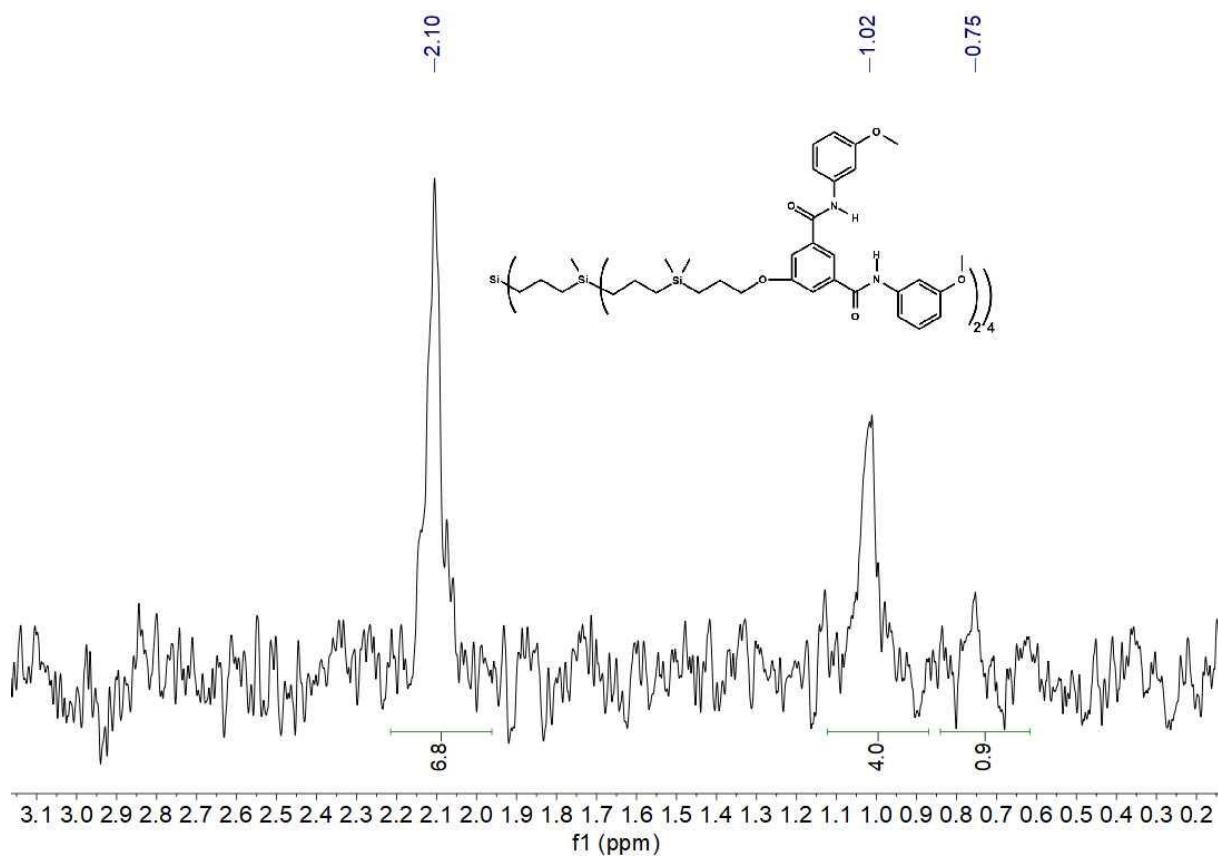

**Figure S22.** Receptor **Dm2**  $^{29}\text{Si}$  NMR (80 MHz),  $\text{DMSO-}d_6$ .

## NMR titration data

### Compound **M1**

| c <b>M1</b><br>[mol/L] | c TBA <sup>+</sup> H <sub>2</sub> PO <sub>4</sub> <sup>-</sup><br>[mol/L] | Δ shift<br>[Hz] |
|------------------------|---------------------------------------------------------------------------|-----------------|
| 0.0021                 | 0                                                                         | 0               |
| 0.0021                 | 0.0010                                                                    | 509.9           |
| 0.0021                 | 0.0020                                                                    | 1042.2          |
| 0.0021                 | 0.0029                                                                    | 1146.0          |
| 0.0021                 | 0.0047                                                                    | 1170.3          |
| 0.0021                 | 0.0064                                                                    | 1185.0          |
| 0.0021                 | 0.0087                                                                    | 1195.5          |
| 0.0021                 | 0.0120                                                                    | 1200.8          |
| 0.0021                 | 0.0149                                                                    | 1205.3          |
| 0.0021                 | 0.0196                                                                    | 1207.5          |
| 0.0021                 | 0.0522                                                                    | 1229.4          |

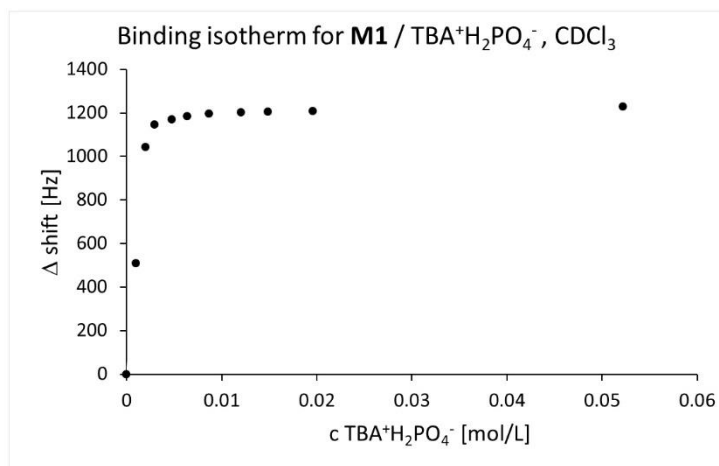

**Figure S23.** <sup>1</sup>H NMR titration of **M1** by TBA<sup>+</sup>H<sub>2</sub>PO<sub>4</sub><sup>-</sup> in CDCl<sub>3</sub>

| c <b>M1</b><br>[mol/L] | c TBA <sup>+</sup> H <sub>2</sub> PO <sub>4</sub> <sup>-</sup><br>[mol/L] | Δ shift<br>[Hz] |
|------------------------|---------------------------------------------------------------------------|-----------------|
| 0.0105                 | 0                                                                         | 0               |
| 0.0105                 | 0.0021                                                                    | 79.4            |
| 0.0105                 | 0.0059                                                                    | 225.6           |
| 0.0105                 | 0.0095                                                                    | 302.0           |
| 0.0105                 | 0.0128                                                                    | 352.8           |
| 0.0105                 | 0.0174                                                                    | 406.0           |
| 0.0105                 | 0.0242                                                                    | 452.4           |
| 0.0105                 | 0.0299                                                                    | 478.9           |
| 0.0105                 | 0.0392                                                                    | 510.0           |
| 0.0105                 | 0.0465                                                                    | 532.0           |
| 0.0105                 | 0.1047                                                                    | 608.0           |

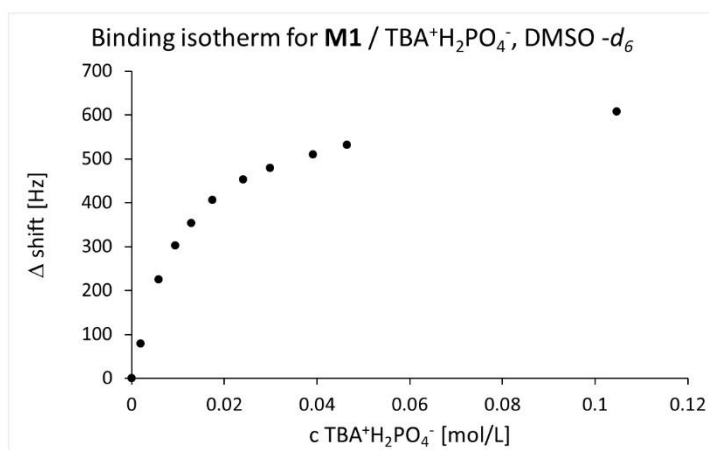

**Figure S24.** <sup>1</sup>H NMR titration of **M1** by TBA<sup>+</sup>H<sub>2</sub>PO<sub>4</sub><sup>-</sup> in DMSO-*d*<sub>6</sub>.

| c <b>M1</b><br>[mol/L] | c TBA <sup>+</sup> Cl <sup>-</sup><br>[mol/L] | Δ shift<br>[Hz] |
|------------------------|-----------------------------------------------|-----------------|
| 0.0052                 | 0                                             | 0               |
| 0.0052                 | 0.0025                                        | 578.8           |
| 0.0052                 | 0.0049                                        | 1025.1          |
| 0.0052                 | 0.0072                                        | 1078.6          |
| 0.0052                 | 0.0116                                        | 1094.6          |
| 0.0052                 | 0.0157                                        | 1103.8          |
| 0.0052                 | 0.0213                                        | 1109.1          |
| 0.0052                 | 0.0295                                        | 1111.3          |
| 0.0052                 | 0.0365                                        | 1112.0          |
| 0.0052                 | 0.0479                                        | 1116.4          |

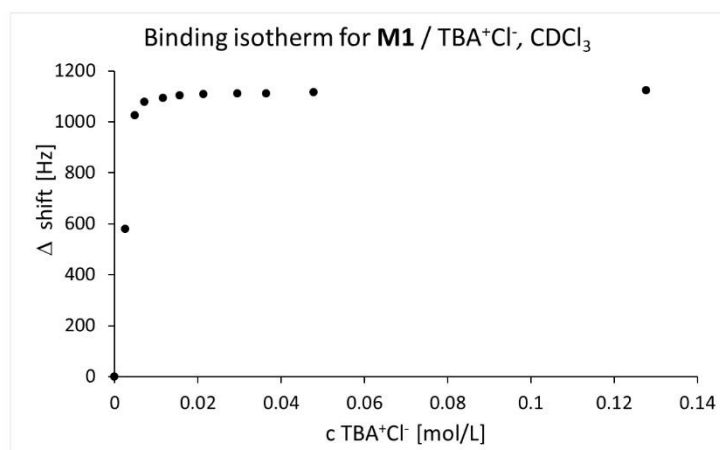

**Figure S25.** <sup>1</sup>H NMR titration of **M1** by TBA<sup>+</sup>Cl<sup>-</sup> in CDCl<sub>3</sub>.

| c <b>M1</b><br>[mol/L] | c TBA <sup>+</sup> Cl <sup>-</sup><br>[mol/L] | Δ shift<br>[Hz] |
|------------------------|-----------------------------------------------|-----------------|
| 0.0111                 | 0                                             | 0               |
| 0.0111                 | 0.0032                                        | 31.6            |
| 0.0111                 | 0.0062                                        | 59.6            |
| 0.0111                 | 0.0091                                        | 82.0            |
| 0.0111                 | 0.0147                                        | 110.2           |
| 0.0111                 | 0.0198                                        | 128.6           |
| 0.0111                 | 0.0269                                        | 145.6           |
| 0.0111                 | 0.0372                                        | 173.0           |
| 0.0111                 | 0.0461                                        | 198.0           |
| 0.0111                 | 0.0605                                        | 215.9           |
| 0.0111                 | 0.1613                                        | 276.1           |

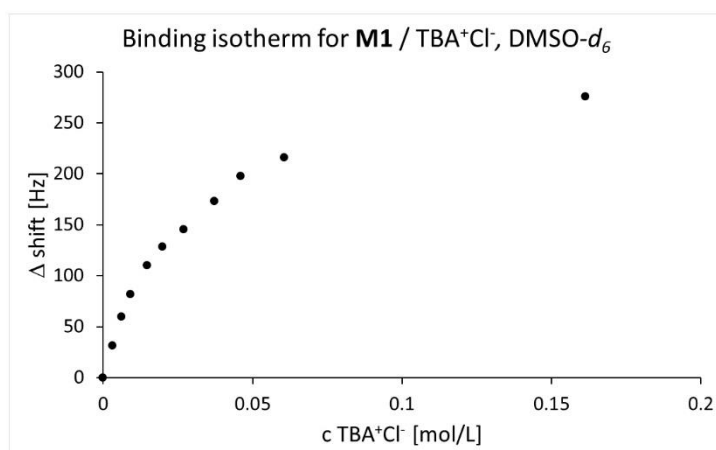

**Figure S26.** <sup>1</sup>H NMR titration of **M1** by TBA<sup>+</sup>Cl<sup>-</sup> in DMSO-*d*<sub>6</sub>.

| c <b>M1</b><br>[mol/L] | c TBA <sup>+</sup> Br <sup>-</sup><br>[mol/L] | Δ shift<br>[Hz] |
|------------------------|-----------------------------------------------|-----------------|
| 0.0063                 | 0                                             | 0               |
| 0.0063                 | 0.0022                                        | 284.0           |
| 0.0063                 | 0.0042                                        | 685.7           |
| 0.0063                 | 0.0062                                        | 861.2           |
| 0.0063                 | 0.0100                                        | 923.9           |
| 0.0063                 | 0.0135                                        | 960.7           |
| 0.0063                 | 0.0184                                        | 983.6           |
| 0.0063                 | 0.0254                                        | 994.0           |
| 0.0063                 | 0.0315                                        | 1003.4          |
| 0.0063                 | 0.0413                                        | 1006.9          |
| 0.0063                 | 0.1102                                        | 1016.3          |

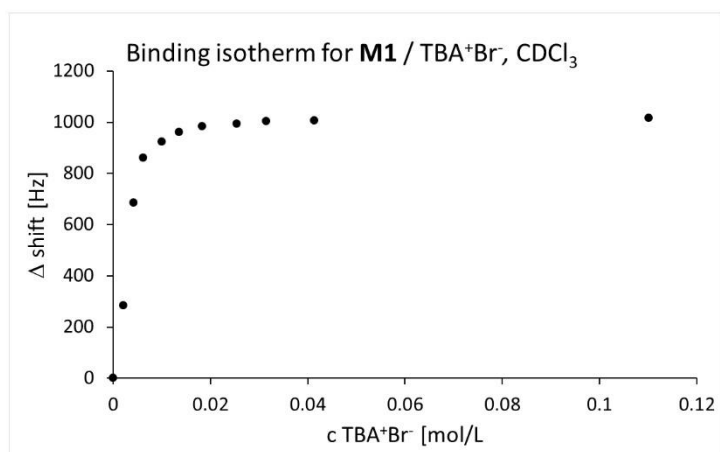

**Figure S27.** <sup>1</sup>H NMR titration of **M1** by TBA<sup>+</sup>Br<sup>-</sup> in CDCl<sub>3</sub>.

| c <b>M1</b><br>[mol/L] | c TBA <sup>+</sup> Br <sup>-</sup><br>[mol/L] | Δ shift<br>[Hz] |
|------------------------|-----------------------------------------------|-----------------|
| 0.0122                 | 0                                             | 0               |
| 0.0122                 | 0.0025                                        | 1.0             |
| 0.0122                 | 0.0071                                        | 2.8             |
| 0.0122                 | 0.0114                                        | 2.8             |
| 0.0122                 | 0.0154                                        | 5.6             |
| 0.0122                 | 0.0210                                        | 7.6             |
| 0.0122                 | 0.0290                                        | 10.4            |
| 0.0122                 | 0.0359                                        | 12.6            |
| 0.0122                 | 0.0472                                        | 16.3            |
| 0.0122                 | 0.0559                                        | 18.0            |
| 0.0122                 | 0.1258                                        | 35.9            |

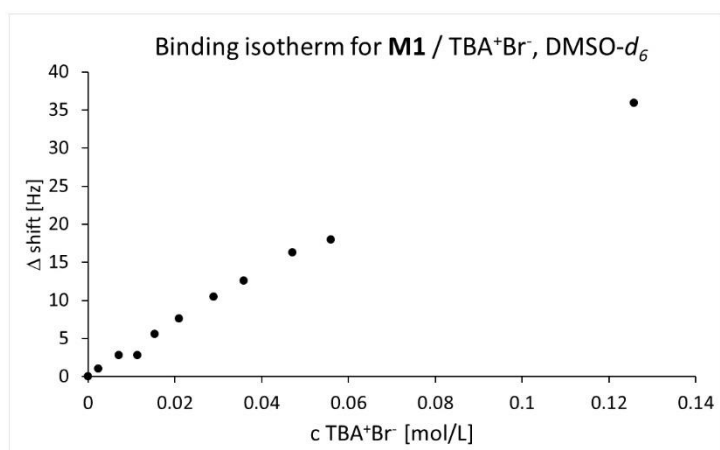

**Figure S28.** <sup>1</sup>H NMR titration of **M1** by TBA<sup>+</sup>Br<sup>-</sup> in DMSO-*d*<sub>6</sub>.

| c <b>M1</b><br>[mol/L] | c TBA <sup>+</sup> AcO <sup>-</sup><br>[mol/L] | Δ shift<br>[Hz] |
|------------------------|------------------------------------------------|-----------------|
| 0.0052                 | 0                                              | 0               |
| 0.0052                 | 0.0016                                         | 277.7           |
| 0.0052                 | 0.0032                                         | 676.4           |
| 0.0052                 | 0.0047                                         | 924.9           |
| 0.0052                 | 0.0076                                         | 1092.6          |
| 0.0052                 | 0.0102                                         | 1149.7          |
| 0.0052                 | 0.0139                                         | 1158.4          |
| 0.0052                 | 0.0192                                         | 1173.5          |
| 0.0052                 | 0.0238                                         | 1186.7          |
| 0.0052                 | 0.0312                                         | 1191.8          |
| 0.0052                 | 0.0832                                         | 1216.1          |

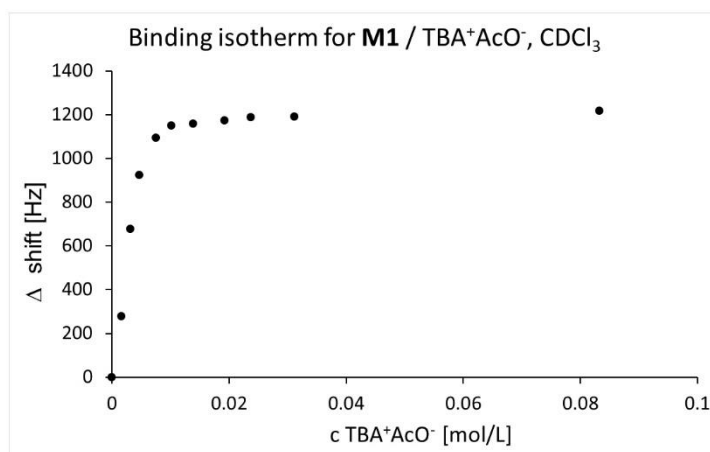

**Figure S29.** <sup>1</sup>H NMR titration of **M1** by TBA<sup>+</sup>AcO<sup>-</sup> in CDCl<sub>3</sub>.

| c <b>M1</b><br>[mol/L] | c TBA <sup>+</sup> AcO <sup>-</sup><br>[mol/L] | Δ shift<br>[Hz] |
|------------------------|------------------------------------------------|-----------------|
| 0.0117                 | 0                                              | 0               |
| 0.0117                 | 0.0015                                         | 53.8            |
| 0.0117                 | 0.0043                                         | 143.2           |
| 0.0117                 | 0.0069                                         | 211.2           |
| 0.0117                 | 0.0093                                         | 262.3           |
| 0.0117                 | 0.0126                                         | 319.2           |
| 0.0117                 | 0.0175                                         | 381.8           |
| 0.0117                 | 0.0217                                         | 419.7           |
| 0.0117                 | 0.0284                                         | 463.4           |
| 0.0117                 | 0.0337                                         | 482.5           |
| 0.0117                 | 0.0758                                         | 612.7           |

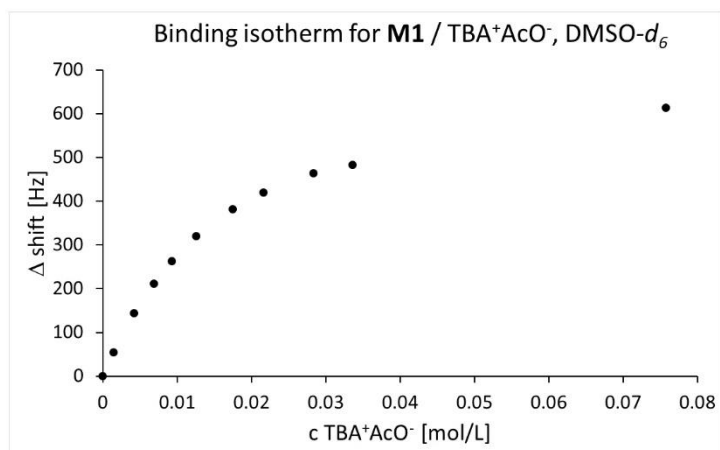

**Figure S30.** <sup>1</sup>H NMR titration of **M1** by TBA<sup>+</sup>AcO<sup>-</sup> in DMSO-*d*<sub>6</sub>.

| c <b>M1</b><br>[mol/L] | c TBA <sup>+</sup> BzO <sup>-</sup><br>[mol/L] | Δ shift<br>[Hz] |
|------------------------|------------------------------------------------|-----------------|
| 0.0088                 | 0                                              | 0               |
| 0.0088                 | 0.0024                                         | 398.4           |
| 0.0088                 | 0.0047                                         | 721.3           |
| 0.0088                 | 0.0070                                         | 959.0           |
| 0.0088                 | 0.0112                                         | 1306.6          |
| 0.0088                 | 0.0151                                         | 1356.6          |
| 0.0088                 | 0.0205                                         | 1362.8          |
| 0.0088                 | 0.0284                                         | 1383.2          |
| 0.0088                 | 0.0352                                         | 1382.6          |
| 0.0088                 | 0.0462                                         | 1383.2          |
| 0.0088                 | 0.1231                                         | 1381.2          |

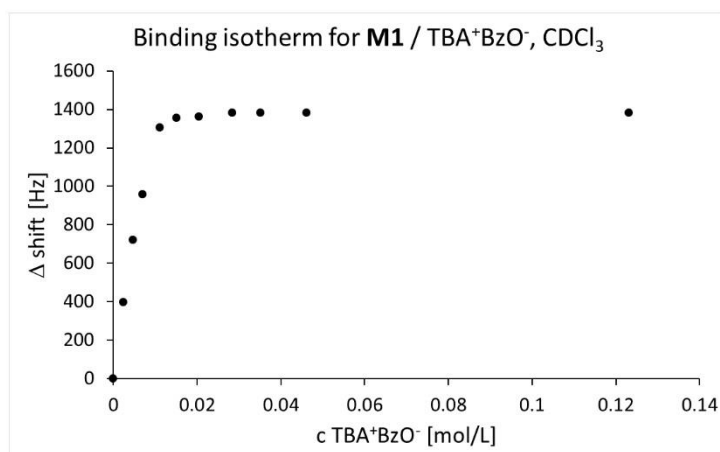

**Figure S31.** <sup>1</sup>H NMR titration of **M1** by TBA<sup>+</sup>BzO<sup>-</sup> in CDCl<sub>3</sub>.

| c <b>M1</b><br>[mol/L] | c TBA <sup>+</sup> BzO <sup>-</sup><br>[mol/L] | Δ shift<br>[Hz] |
|------------------------|------------------------------------------------|-----------------|
| 0.0046                 | 0                                              | 0               |
| 0.0046                 | 0.0011                                         | 71.4            |
| 0.0046                 | 0.0021                                         | 117.1           |
| 0.0046                 | 0.0031                                         | 166.2           |
| 0.0046                 | 0.0051                                         | 246.6           |
| 0.0046                 | 0.0068                                         | 286.6           |
| 0.0046                 | 0.0093                                         | 338.8           |
| 0.0046                 | 0.0129                                         | 390.2           |
| 0.0046                 | 0.0159                                         | 425.1           |
| 0.0046                 | 0.0209                                         | 478.3           |
| 0.0046                 | 0.0558                                         | 577.9           |

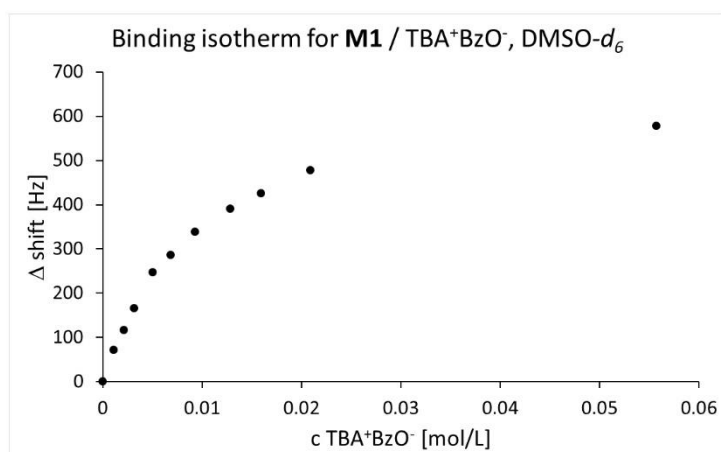

**Figure S32.** <sup>1</sup>H NMR titration of **M1** by TBA<sup>+</sup>BzO<sup>-</sup> in DMSO-*d*<sub>6</sub>.

| c <b>M1</b><br>[mol/L] | c DMSO<br>[mol/L] | $\Delta$ shift<br>[Hz] |
|------------------------|-------------------|------------------------|
| 0.0105                 | 0                 | 0                      |
| 0.0105                 | 0.0034            | 15.8                   |
| 0.0105                 | 0.0097            | 42.7                   |
| 0.0105                 | 0.0156            | 67.5                   |
| 0.0105                 | 0.0211            | 86.8                   |
| 0.0105                 | 0.0287            | 110.5                  |
| 0.0105                 | 0.0397            | 142.6                  |
| 0.0105                 | 0.0492            | 165.4                  |
| 0.0105                 | 0.0645            | 194.8                  |
| 0.0105                 | 0.0765            | 221.2                  |
| 0.0105                 | 0.1721            | 336.7                  |

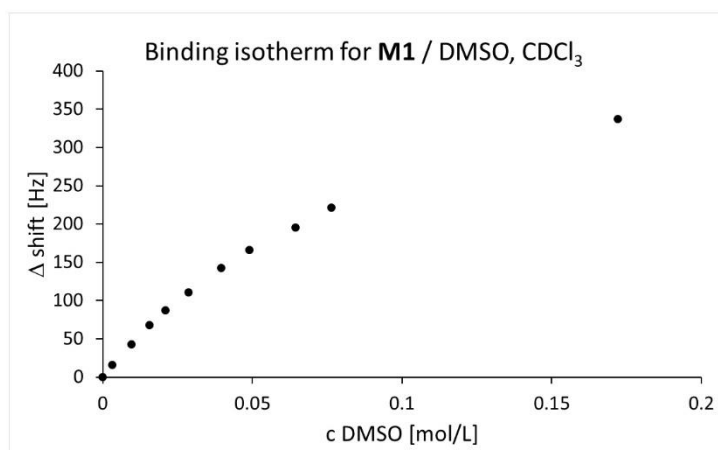

**Figure S33.**  $^1\text{H}$  NMR titration of **M1** by DMSO in  $\text{CDCl}_3$ .

#### Compound **Dm1**

| c <b>Dm1</b><br>[mol/L] | c $\text{TBA}^+\text{H}_2\text{PO}_4^-$<br>[mol/L] | $\Delta$ shift<br>[Hz] |
|-------------------------|----------------------------------------------------|------------------------|
| 0.0092                  | 0                                                  | 0                      |
| 0.0092                  | 0.0027                                             | 2.1                    |
| 0.0092                  | 0.0077                                             | 35.7                   |
| 0.0092                  | 0.0124                                             | 66.5                   |
| 0.0092                  | 0.0168                                             | 103.7                  |
| 0.0092                  | 0.0228                                             | 199.7                  |
| 0.0092                  | 0.0316                                             | 719.7                  |
| 0.0092                  | 0.0391                                             | 1011.5                 |
| 0.0092                  | 0.0513                                             | 1068.3                 |
| 0.0092                  | 0.0608                                             | 1085.7                 |
| 0.0092                  | 0.1367                                             | 1145.4                 |

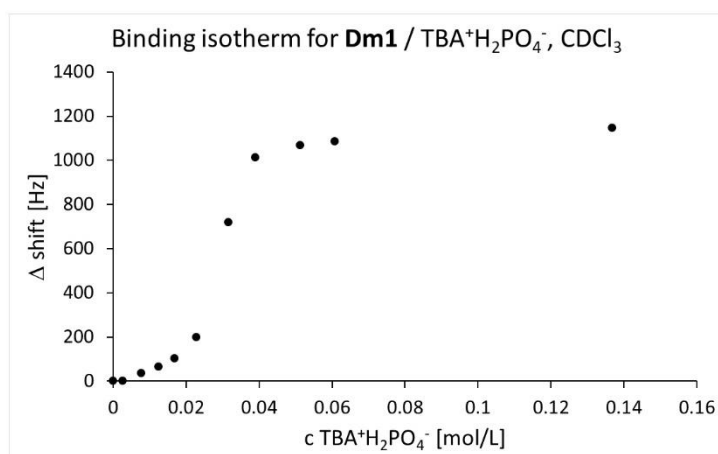

**Figure S34.**  $^1\text{H}$  NMR titration of **Dm1** by  $\text{TBA}^+\text{H}_2\text{PO}_4^-$  in  $\text{CDCl}_3$ .

| Dm1, mole fraction | $\Delta$ shift [Hz]*mole fraction of Dm1 |
|--------------------|------------------------------------------|
| 1                  | 0                                        |
| 0.7747             | 1.6                                      |
| 0.5436             | 19.4                                     |
| 0.4259             | 28.3                                     |
| 0.3544             | 36.8                                     |
| 0.2880             | 57.5                                     |
| 0.2261             | 162.7                                    |
| 0.1909             | 193.2                                    |
| 0.1524             | 162.8                                    |
| 0.1317             | 143.0                                    |
| 0.0631             | 72.4                                     |

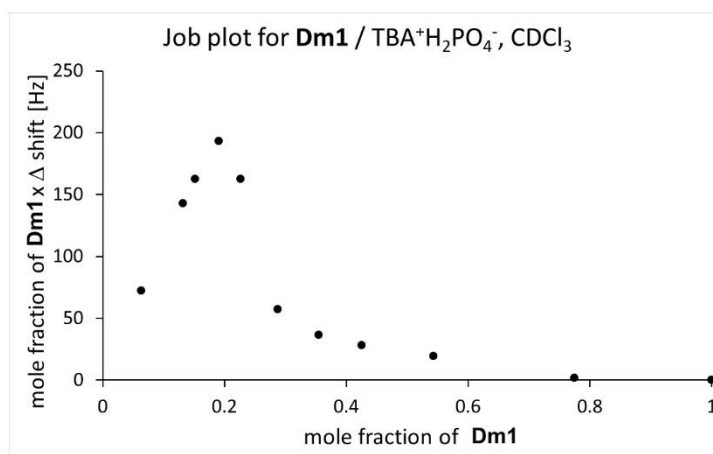

**Figure S35.** Job plot of the system **Dm1** /  $\text{TBA}^+\text{H}_2\text{PO}_4^-$  in  $\text{CDCl}_3$ .

| c Dm1 [mol/L] | c $\text{TBA}^+\text{H}_2\text{PO}_4^-$ [mol/L] | $\Delta$ shift [Hz] |
|---------------|-------------------------------------------------|---------------------|
| 0.0098        | 0                                               | 0                   |
| 0.0098        | 0.0025                                          | 12.6                |
| 0.0098        | 0.0049                                          | 74.4                |
| 0.0098        | 0.0073                                          | 128.6               |
| 0.0098        | 0.0117                                          | 178.3               |
| 0.0098        | 0.0158                                          | 222.5               |
| 0.0098        | 0.0214                                          | 274.5               |
| 0.0098        | 0.0297                                          | 305.9               |
| 0.0098        | 0.0367                                          | 351.1               |
| 0.0098        | 0.0482                                          | 376.7               |
| 0.0098        | 0.1285                                          | 564.4               |

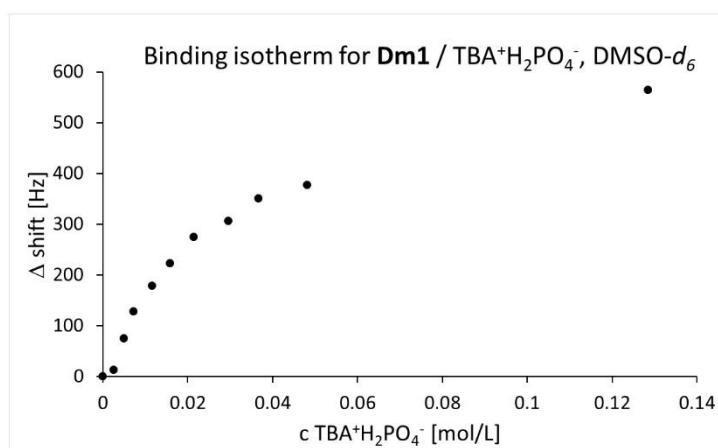

**Figure S36.**  $^1\text{H}$  NMR titration of **Dm1** by  $\text{TBA}^+\text{H}_2\text{PO}_4^-$  in  $\text{DMSO}-d_6$ .

| <b>Dm1</b> , mole fraction | $\Delta$ shift [Hz]*mole fraction of <b>Dm1</b> |
|----------------------------|-------------------------------------------------|
| 1                          | 0                                               |
| 0.7945                     | 10.0                                            |
| 0.6637                     | 49.4                                            |
| 0.5728                     | 73.6                                            |
| 0.4550                     | 81.1                                            |
| 0.3819                     | 85.0                                            |
| 0.3129                     | 85.9                                            |
| 0.2475                     | 75.7                                            |
| 0.2099                     | 73.7                                            |
| 0.1683                     | 63.4                                            |
| 0.0705                     | 39.8                                            |

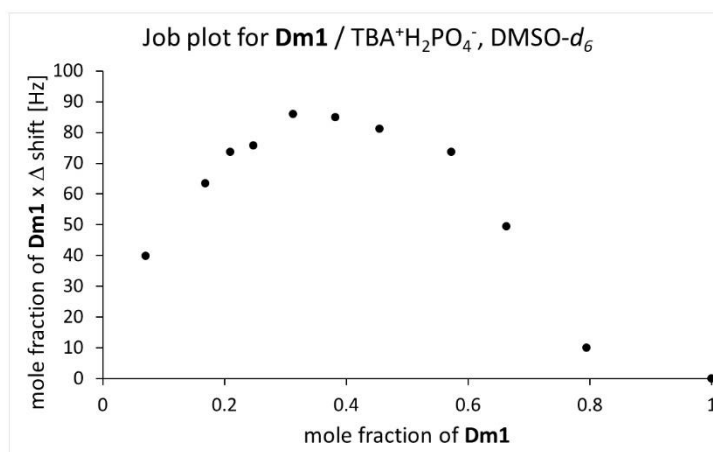

**Figure S37.** Job plot of the system **Dm1** /  $\text{TBA}^+\text{H}_2\text{PO}_4^-$  in  $\text{DMSO-}d_6$ .

### Compound **Dm2**

| <b>c Dm2</b><br>[mol/L] | <b>c TBA<sup>+</sup>H<sub>2</sub>PO<sub>4</sub><sup>-</sup></b><br>[mol/L] | $\Delta$ shift<br>[Hz] |
|-------------------------|----------------------------------------------------------------------------|------------------------|
| 0.0055                  | 0                                                                          | 0                      |
| 0.0055                  | 0.0024                                                                     | 12.2                   |
| 0.0055                  | 0.0068                                                                     | 44.0                   |
| 0.0055                  | 0.0110                                                                     | 88.3                   |
| 0.0055                  | 0.0148                                                                     | 180.4                  |
| 0.0055                  | 0.0201                                                                     | 308.2                  |
| 0.0055                  | 0.0279                                                                     | 528.3                  |
| 0.0055                  | 0.0345                                                                     | 704.0                  |
| 0.0055                  | 0.0453                                                                     | 928.5                  |
| 0.0055                  | 0.0537                                                                     | 1000.1                 |
| 0.0055                  | 0.0806                                                                     | 1090.3                 |
| 0.0055                  | 0.1209                                                                     | 1164.0                 |

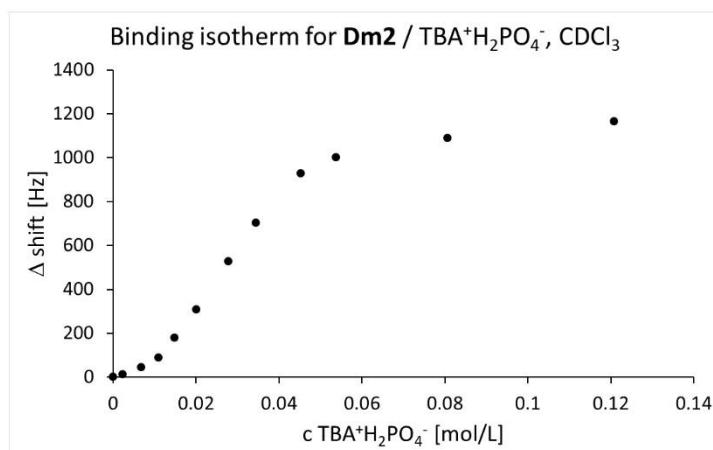

**Figure S38.**  $^1\text{H}$  NMR titration of **Dm2** by  $\text{TBA}^+\text{H}_2\text{PO}_4^-$  in  $\text{CDCl}_3$ .

| Dm2, mole fraction | $\Delta$ shift [Hz]*mole fraction of Dm2 |
|--------------------|------------------------------------------|
| 1                  | 0                                        |
| 0.7002             | 8.4                                      |
| 0.4473             | 19.7                                     |
| 0.3350             | 29.5                                     |
| 0.2716             | 48.9                                     |
| 0.2156             | 66.4                                     |
| 0.1656             | 87.4                                     |
| 0.1382             | 97.3                                     |
| 0.1088             | 101.0                                    |
| 0.0934             | 93.4                                     |
| 0.0642             | 70.1                                     |
| 0.0438             | 51.0                                     |

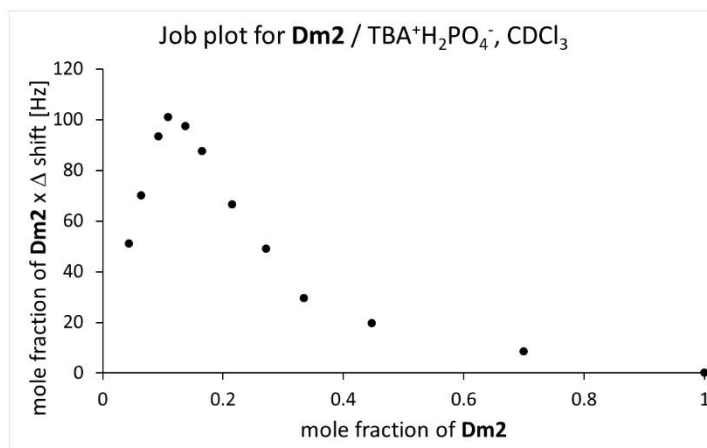

**Figure S39.** Job plot of the system **Dm2** /  $\text{TBA}^+\text{H}_2\text{PO}_4^-$  in  $\text{CDCl}_3$ .

| c Dm2 [mol/L] | c $\text{TBA}^+\text{H}_2\text{PO}_4^-$ [mol/L] | $\Delta$ shift [Hz] |
|---------------|-------------------------------------------------|---------------------|
| 0.0051        | 0                                               | 0                   |
| 0.0051        | 0.0025                                          | 8.1                 |
| 0.0051        | 0.0071                                          | 44.5                |
| 0.0051        | 0.0114                                          | 68.2                |
| 0.0051        | 0.0154                                          | 120.0               |
| 0.0051        | 0.0209                                          | 180.1               |
| 0.0051        | 0.0289                                          | 235.9               |
| 0.0051        | 0.0358                                          | 276.0               |
| 0.0051        | 0.0469                                          | 316.1               |
| 0.0051        | 0.0556                                          | 348.1               |
| 0.0051        | 0.1252                                          | 540.2               |

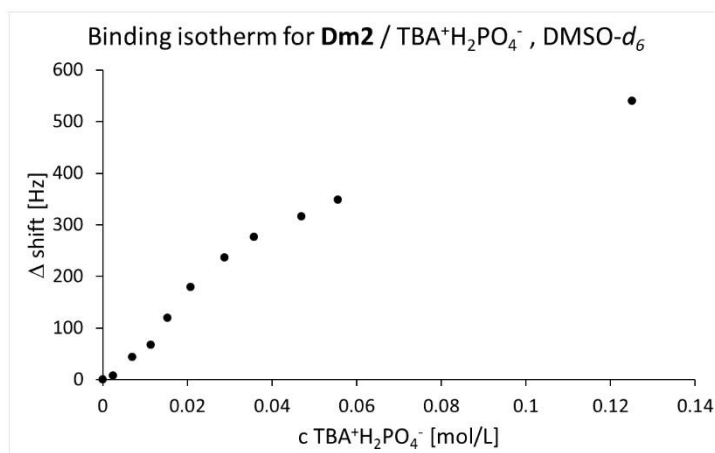

**Figure S40.**  $^1\text{H}$  NMR titration of **Dm2** by  $\text{TBA}^+\text{H}_2\text{PO}_4^-$  in  $\text{DMSO}-d_6$ .

| Dm2, mole<br>fraction | $\Delta$ shift [Hz]*mole<br>fraction of Dm2 |
|-----------------------|---------------------------------------------|
| 1                     | 0                                           |
| 0.6745                | 5.4                                         |
| 0.4179                | 18.4                                        |
| 0.3089                | 21.0                                        |
| 0.2486                | 29.8                                        |
| 0.1960                | 35.3                                        |
| 0.1497                | 35.3                                        |
| 0.1245                | 34.4                                        |
| 0.0978                | 30.9                                        |
| 0.0838                | 29.2                                        |
| 0.0390                | 21.1                                        |

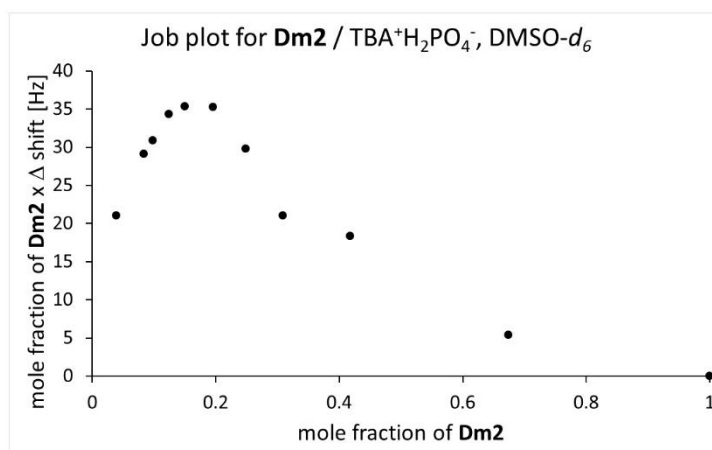

**Figure S41.** Job plot of the system **Dm2** / TBA<sup>+</sup>H<sub>2</sub>PO<sub>4</sub><sup>-</sup> in DMSO-*d*<sub>6</sub>.

## Detailed description of dialytic experiments

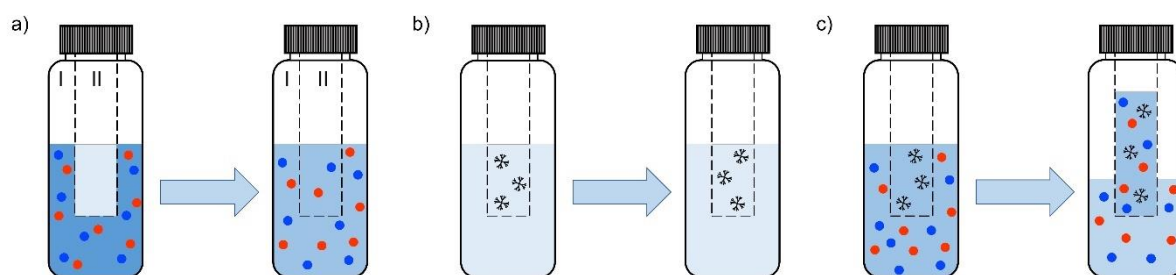

**Figure S42.** Schematic depiction of preliminary experiments; a) ions in comp. I and no receptor in comp. II, b) no ions in comp. I and receptor in comp. II, and c) ions in comp. I and receptor in comp. II.

**Table S1.** Setting of the preliminary experiments, corresponding to Figure S43.

| Setting | Time [h] | $V_I$ [mL] | $V_{II}$ [mL] | $C_{DmI}$ [mol/L] | $C_{p-I}$ [mol/L] | $C_{p-II}$ [mol/L] | $n_{transI}$ [mmol] |
|---------|----------|------------|---------------|-------------------|-------------------|--------------------|---------------------|
| a)      | 0        | 3.00       | 0.50          | 0                 | 0.0100            | 0                  | 0                   |
|         | 24       | 3.00       | 0.50          | 0                 | 0.0086            | 0.0080             | 0.0040              |
| b)      | 0        | 3.00       | 0.50          | 0.0100            | 0                 | 0                  | 0                   |
|         | 24       | 3.00       | 0.50          | 0.0100            | 0                 | 0                  | 0                   |
| c)      | 0        | 3.00       | 0.50          | 0.0100            | 0.0100            | 0                  | 0                   |
|         | 24       | 2.85       | 0.65          | 0.0077            | 0.0080            | 0.0100             | 0.0065              |
| c)      | 0        | 3.00       | 0.50          | 0.0100            | 0.0230            | 0                  | 0                   |
|         | 24       | 2.10       | 1.40          | 0.0036            | 0.0185            | 0.0230             | 0.0322              |

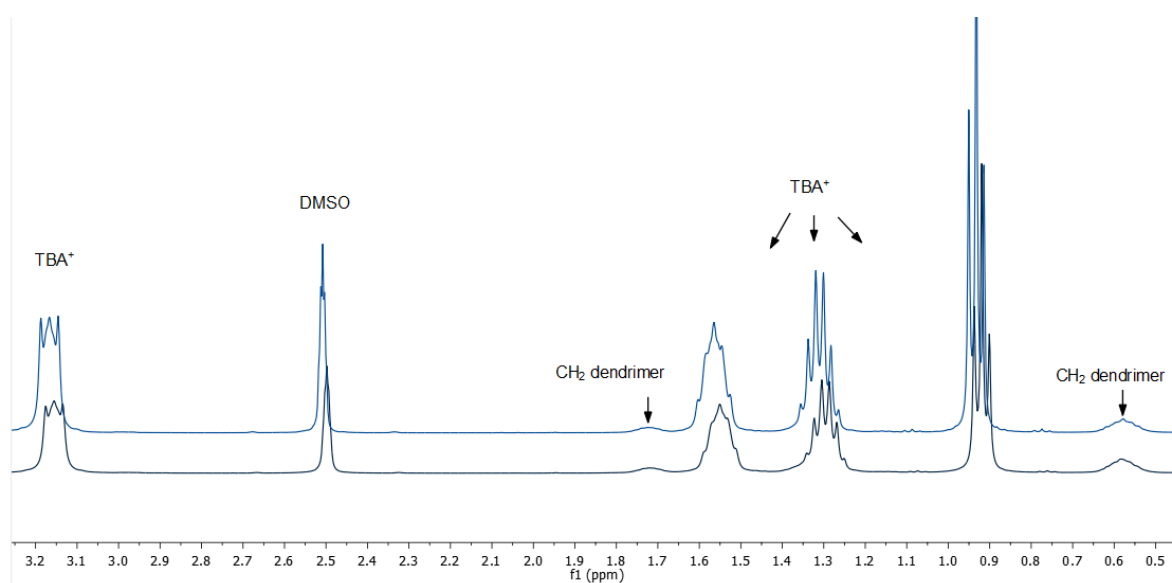

**Figure S43.** Comparison of <sup>1</sup>H NMR spectra of compartment II taken in time 0 (dark blue) and in 24h (light blue) and the indication of the signals used for integration.

## Details for the final dialytic experiments

**Table S2.** Detailed description of dialytic experiments

| Entry | Receptor ID<br>$n_{Dm}; n_P$ | Time<br>[h] | $V_I$<br>[mL] | $V_{II}$<br>[mL] | $c_{P-I}$<br>[mol/L] | $c_{P-II}$<br>[mol/L] | $\Delta c_P$<br>[mol/L] | $n_{P-I}$<br>[mmol] | $n_{P-II}$<br>[mmol] | $\Sigma n$<br>[mmol] | $c_{Dm-II}$<br>[mol/L] | $n_{Dm-II}$<br>[mmol] | $n_{transf}$<br>[mmol] |
|-------|------------------------------|-------------|---------------|------------------|----------------------|-----------------------|-------------------------|---------------------|----------------------|----------------------|------------------------|-----------------------|------------------------|
| 1     | <b>Dm1</b><br>1:1            | 0           | 3.10          | 0.50             | 0.0101               | 0.0101                | 0                       | 0.0312              | 0.0050               | 0.0362               | 0.0084                 | 0.0042                | 0                      |
|       |                              | 24          | 2.75          | 0.85             | 0.0097               | 0.0108                | 0.0011                  | 0.0266              | 0.0091               | 0.0357               | 0.0050                 | 0.0038                | 0.0041                 |
| 2     | <b>Dm1</b><br>1:3            | 0           | 3.10          | 0.50             | 0.0258               | 0.0258                | 0                       | 0.0776              | 0.0128               | 0.0904               | 0.0091                 | 0.0045                | 0                      |
|       |                              | 24          | 2.55          | 0.96             | 0.0230               | 0.0311                | 0.0081                  | 0.0587              | 0.0297               | 0.0885               | 0.0047                 | 0.0041                | 0.0169                 |
| 3     | <b>Dm1</b><br>1:5.5          | 0           | 3.10          | 0.50             | 0.0504               | 0.0504                | 0                       | 0.1505              | 0.0250               | 0.1755               | 0.0091                 | 0.0045                | 0                      |
|       |                              | 24          | 2.68          | 0.80             | 0.0483               | 0.0556                | 0.0073                  | 0.1294              | 0.0446               | 0.1741               | 0.0056                 | 0.0041                | 0.0197                 |
| 4     | <b>Dm1</b><br>1:11.5         | 0           | 3.10          | 0.50             | 0.0818               | 0.0818                | 0                       | 0.2464              | 0.0408               | 0.2872               | 0.0071                 | 0.0035                | 0                      |
|       |                              | 24          | 2.61          | 0.90             | 0.0797               | 0.0834                | 0.0037                  | 0.2080              | 0.0752               | 0.2832               | 0.0039                 | 0.0032                | 0.0344                 |
| 5     | <b>Dm1</b><br>1:10           | 0           | 3.10          | 0.50             | 0.0493               | 0.0493                | 0                       | 0.1479              | 0.0246               | 0.1725               | 0.0049                 | 0.0025                | 0                      |
|       |                              | 24          | 2.73          | 0.77             | 0.0478               | 0.0504                | 0.0026                  | 0.1302              | 0.0389               | 0.1692               | 0.0032                 | 0.0022                | 0.0143                 |
| 6     | <b>Dm2</b><br>1:3            | 0           | 3.10          | 0.50             | 0.0247               | 0.0247                | 0                       | 0.0783              | 0.0124               | 0.0907               | 0.0084                 | 0.0042                | 0                      |
|       |                              | 24          | 2.72          | 0.95             | 0.0224               | 0.0257                | 0.0033                  | 0.0608              | 0.0244               | 0.0852               | 0.0045                 | 0.0038                | 0.0120                 |
| 7     | <b>Dm2</b><br>1:6            | 0           | 3.10          | 0.50             | 0.0253               | 0.0253                | 0                       | 0.0765              | 0.0126               | 0.0892               | 0.0044                 | 0.0022                | 0                      |
|       |                              | 24          | 2.77          | 0.75             | 0.0247               | 0.0284                | 0.0038                  | 0.0682              | 0.0214               | 0.0896               | 0.0029                 | 0.0020                | 0.0088                 |
| 8     | <b>Dm2</b><br>1:13           | 0           | 3.10          | 0.50             | 0.0496               | 0.0496                | 0                       | 0.1574              | 0.0258               | 0.1832               | 0.0037                 | 0.0019                | 0                      |
|       |                              | 24          | 2.93          | 0.76             | 0.0471               | 0.0569                | 0.0098                  | 0.1381              | 0.0432               | 0.1812               | 0.0026                 | 0.0017                | 0.0173                 |
| 9     | <b>Dm2</b><br>1:20           | 0           | 3.10          | 0.50             | 0.0495               | 0.0495                | 0                       | 0.1485              | 0.0248               | 0.1733               | 0.0025                 | 0.0012                | 0                      |
|       |                              | 24          | 2.63          | 0.87             | 0.0465               | 0.0530                | 0.0065                  | 0.1225              | 0.0458               | 0.1684               | 0.0014                 | 0.0011                | 0.0211                 |
| 10    | <b>Dm2</b><br>1:30           | 0           | 3.10          | 0.50             | 0.0914               | 0.0914                | 0                       | 0.2833              | 0.0457               | 0.3289               | 0.0029                 | 0.0015                | 0                      |
|       |                              | 24          | 2.41          | 1.19             | 0.0876               | 0.0946                | 0.0070                  | 0.2114              | 0.1123               | 0.3237               | 0.0012                 | 0.0013                | 0.0666                 |

Abbreviations used in **Table S1** and **Table S2**:

$n_A$  amount of substance of  $TBA^+H_2PO_4^-$  [mmol]

$n_{Dm}$  amount of substance of respective dendrimer [mmol]

$V_I$  volume contained in compartment I [mL]

$V_{II}$  volume contained in compartment II [mL]

$c_{A-I}$  molar concentration of  $TBA^+H_2PO_4^-$  in compartment I [mol/L]

$c_{A-II}$  molar concentration of  $TBA^+H_2PO_4^-$  in compartment II [mol/L]

$c_{Dm}$  molar concentration of respective dendrimer in compartment II [mol/L]

$n_{A-I}$  amount of substance of  $TBA^+H_2PO_4^-$  in compartment I [mmol]

$n_{A-II}$  amount of substance of  $TBA^+H_2PO_4^-$  in compartment II [mmol]

$n_{transf}$  amount of substance of  $TBA^+H_2PO_4^-$  transferred over the membrane [mmol].

## Computer Modelling

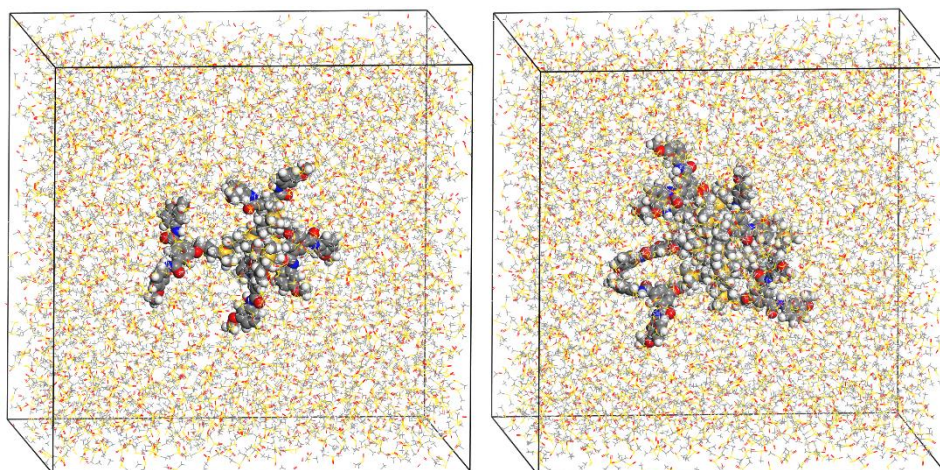

**Figure S44.** Visualization of the simulated systems i.e. dendrimers **Dm1** (left), **Dm2** (right) surrounded by 3000 DMSO molecules in simulation box.

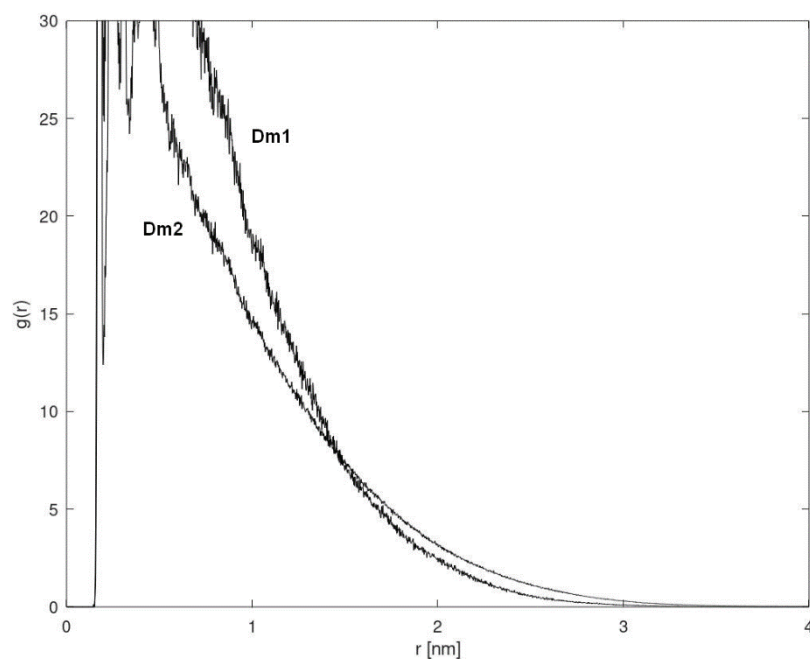

**Figure S45.** Selected part of the radial distribution functions of the dendrimers hydrogen atoms in case of **Dm1** and **Dm2**. The  $r$  value, where the  $g(r)$  is approaching zero determines the largest dendrimer dimension.
